1 **Atomic view into *Plasmodium* actin polymerization, ATP hydrolysis, and phosphate release**

2

3 Esa-Pekka Kumpula<sup>a</sup>, Andrea J. López<sup>b</sup>, Leila Tajedin<sup>b</sup>, Huijong Han<sup>a,c</sup> & Inari Kursula<sup>a,b,c\*</sup>

4

5 <sup>a</sup>Biocenter Oulu and Faculty of Biochemistry and Molecular Medicine, University of Oulu, Aapistie  
6 7, 90220 Oulu, Finland

7 <sup>b</sup>Department of Biomedicine, University of Bergen, Jonas Lies vei 91, 5009 Bergen, Norway

8 <sup>c</sup>European XFEL GmbH, Holzkoppel 4, 22869 Schenefeld, Germany

9

10 \*Corresponding author: Inari Kursula, Department of Biomedicine, University of Bergen, Jonas  
11 Lies vei 91, 5009 Bergen, Norway; e-mail: inari.kursula@uib.no; tel: +47 5558 6846

12

12 **ABSTRACT**

13 *Plasmodium* actins form very short filaments and have a non-canonical link between ATP  
14 hydrolysis and polymerization. Long filaments are detrimental to the parasites, but the structural  
15 factors constraining *Plasmodium* microfilament lengths are currently unknown. Using high-  
16 resolution crystallography, we show that magnesium binding activates the *Plasmodium* actin I  
17 monomer before polymerization by a slight flattening, which is reversed upon phosphate release. A  
18 coordinated potassium ion resides in the active site during hydrolysis and leaves together with the  
19 phosphate, a process governed by the position of the Arg178/Asp180-containing A-loop. Asp180  
20 interacts with either Lys270 or His74, depending on protonation, while Arg178 links the inner and  
21 outer domains. Hence, the A-loop is a switch between stable and non-stable filament conformations.  
22 Our data provide a comprehensive model for polymerization, phosphate release, and the inherent  
23 instability of parasite microfilaments.

24 Actin is the constituent protein of microfilaments with essential roles in central processes in the cell,  
25 including transport, cell division, and motility<sup>1-3</sup>. The primary biological activity of actin is its  
26 polymerization to form filaments that can generate force at cell membranes or act as scaffolding  
27 structures or tracks for motor proteins<sup>4</sup>. These filaments are on a timer, based on the hydrolysis of  
28 tightly-bound ATP, formation of the stable intermediate ADP-P<sub>i</sub>-actin, and finally, the release of  
29 inorganic phosphate (P<sub>i</sub>)<sup>5</sup>. In model actins, the coupling of nucleotide hydrolysis to filament  
30 stability is well established. In general, ADP-actin depolymerizes much faster than ATP or ADP-P<sub>i</sub>  
31 actin and is therefore the main depolymerizing species<sup>6</sup>. Although ADP-actin can polymerize, its  
32 critical concentration is much higher than that of ATP-actin<sup>6</sup>, which leads to domination of ATP-  
33 actin in polymerization kinetics. Outliers of this functional consensus are actins of the phylum  
34 Apicomplexa, including *Plasmodium* spp. and *Toxoplasma gondii* – both notorious human  
35 pathogens. Actins of these parasites are among the most evolutionarily divergent eukaryotic actins,  
36 while still retaining most of the core features of canonical actins<sup>7-10</sup>. The primary actin of *P.*  
37 *falciparum* and the only one of *T. gondii* are the best understood of the phylum, while others remain  
38 virtually uncharacterized.

39 *In vitro*, apicomplexan actins tend to form only short filaments of ~100 nm without the filament-  
40 stabilizing macrolide jasplakinolide<sup>7-9,11</sup>. *T. gondii* actin (TgAct) has been proposed to follow an  
41 isodesmic polymerization mechanism<sup>10</sup>, which would differ fundamentally from the classical  
42 nucleation-elongation pathway. However, *P. falciparum* actin I (*PfActI*) has a critical concentration  
43 close to that of mammalian  $\alpha$ -actin and a very similar elongation rate<sup>12</sup>. Under ADP-rich  
44 conditions, *PfActI* forms oligomers of 3-12 subunits, while forming larger polymeric species in  
45 polymerizing conditions, together with a significant pool of dimers<sup>8,12</sup>.

46 Structurally, the *PfActI* monomer resembles canonical actins<sup>8</sup> (**Fig. 1a**). The largest structural  
47 differences are at the pointed end, namely subdomain (SD) 2 (containing the DNaseI-binding D-  
48 loop) and parts of SD4, which both connect to SD3 of the next longitudinal protomer in the  
49 filament. The D-loop and the C terminus are both important functional factors but are disordered in  
50 the crystal structure of *PfActI*, reflecting their flexibility<sup>8</sup>. In jasplakinolide-stabilized *PfActI*  
51 filaments, the D-loop is in a clearly altered conformation compared to  $\alpha$ -actin filaments<sup>9</sup>. Yet, the  
52 main hydrophobic interactions are conserved, and the amino acid substitutions are primarily located

53 at the base of the D-loop<sup>8</sup>. In addition, differences in the plug region (residues Ser266-Ala273,  
54 especially Lys270), and some other residues along the filament interface (in particular Val288,  
55 Gly200) also likely contribute to filament instability<sup>9</sup>.

56 The P<sub>i</sub> release pathway from skeletal muscle  $\alpha$ -actin has been studied in detail using molecular  
57 dynamics<sup>13</sup>. In the proposed model, the nucleotide is exchanged *via* a so-called front door, where  
58 the nucleotide is inserted into the active site, and P<sub>i</sub> (together with the cation) exits *via* a back door  
59 on the opposite side. In a follow-up study, this pathway was determined in detail, and it was  
60 suggested that, on its way out, the P<sub>i</sub> interacts mainly with His73 and Arg177<sup>14</sup>.

61 Interestingly, it seems that hydrolysis of ATP and subsequent P<sub>i</sub> release is favorable for  
62 oligomerization of *PfActI*. Structural changes upon these could thus favor nucleus formation – *i.e.*  
63 result in a conformation closer to the filament structure than that of the monomer. Here, we analyze  
64 phosphate release rates and high-resolution structures of wild-type and mutant *Plasmodium* actins in  
65 different nucleotide states, bridging the gap between structure and function in understanding the  
66 polymerization mechanism.

67

## 68 **RESULTS**

### 69 **Phosphate release is decoupled from polymerization in *PfActI***

70 In skeletal muscle  $\alpha$ -actin, conformational changes upon polymerization activate nucleotide  
71 hydrolysis in the actin protomers, and the subsequent P<sub>i</sub> release leads to destabilization of the  
72 “aged” filament<sup>15,16</sup>.  $\alpha$ -actin releases P<sub>i</sub> at rates of  $0.15\text{-}0.47 \times 10^{-4} \text{ s}^{-1}$  at equilibrium<sup>17</sup> and  $14.8 \times$   
73  $10^{-4} \text{ s}^{-1}$  during polymerization<sup>18</sup> (**Supplementary Table 1**). By comparison, equilibrium P<sub>i</sub> release  
74 rates measured from *PfActI* and *PbActII* in the Ca state were  $1.3 \times 10^{-4} \text{ s}^{-1}$  for both actins and in the  
75 Mg state  $3.1 \times 10^{-4} \text{ s}^{-1}$  for *PfActI* and  $1.9 \times 10^{-4} \text{ s}^{-1}$  for *PbActII*<sup>8</sup>. These measurements were  
76 conducted above the critical concentration of either filament end in the ATP state ( $1.5 \mu\text{M}$  for the  
77 barbed end,  $4.5 \mu\text{M}$  for the pointed end in  $1 \text{ mM MgCl}_2$ <sup>6</sup>). To further characterize the relationship  
78 between phosphate release and polymerization, we measured P<sub>i</sub> release rates from *PfActI*, *PbActII*  
79 and  $\alpha$ -actin in  $0.2 \text{ mM Ca}^{2+}$ ,  $1 \text{ mM Mg}^{2+}$ , and  $5 \text{ mM Mg}^{2+}/50 \text{ mM K}^+$  at protein concentrations  
80 around 1 and 3-6  $\mu\text{M}$  each. Contrary to  $\alpha$ -actin, P<sub>i</sub> release rates of the parasite actins did not  
81 increase in the polymerizing MgK conditions at low actin concentrations (**Table 1** and

82 **Supplementary Fig. 1).** This was true also for higher concentrations of *PfActI* but not for *PbActII*  
83 (**Table 2**). At higher concentrations,  $P_i$  release from *PfActI* was instantaneous, while it had a lag  
84 phase in *PbActII* and  $\alpha$ -actin (**Supplementary Fig. 1**). These data suggest that nucleotide  
85 hydrolysis and  $P_i$  release are decoupled from polymerization in *PfActI*.

86  
87 **Gelsolin-bound *PfActI* undergoes slow ATP hydrolysis but fast phosphate release *in crystallo***  
88 Since the major activation of  $P_i$  release from *PfActI* is caused by  $Mg^{2+}$ , we decided to study the  
89 process in detail by analyzing crystal structures of monomeric *PfActI* and *PbActII* in the Mg state  
90 and compare those to the published high-resolution structures of the Ca states<sup>8</sup>. The crystals  
91 diffracted to high resolution (1.2-1.85 Å, **Supplementary Tables 2 and 3**), enabling a detailed  
92 structural analysis. To our surprise, *PfActI* crystals showed a mixture of ATP and ADP in the active  
93 site (**Fig. 1, Supplementary Fig. 2, and Supplementary Text**). Only after aging the crystals for  
94 several months, we could obtain data explained by an ADP-only model (**Fig. 1d**). Despite the mixed  
95 nucleotide state, we were unable to locate free  $P_i$  anywhere within the structure, even after soaking  
96 the aged crystals in  $P_i$ . Contrary to *PfActI*, Mg-*PbActII* crystals contained only ADP just two weeks  
97 after crystallization, despite showing a slightly lower  $P_i$  release rate in solution than *PfActI*  
98 (**Supplementary Fig. 1 and Table 2**). Thus, the effects of gelsolin and/or the crystalline  
99 environment apparently slow down the hydrolysis but not the  $P_i$  release rate of *PfActI*. The  
100 combination of high resolution and slow hydrolysis provides a convenient window to visualize the  
101 structural changes upon activation of  $P_i$  release and polymerization.

### 102 103 **ATP hydrolysis in *PfActI* proceeds through opening and twisting of the monomer**

104 The overall structures of the different nucleotide states of *PfActI* appear very similar, but principal  
105 component analysis (PCA) with a set of 147 unique actin structures identifies two conformational  
106 shifts during the reaction pathway (**Fig. 2, Supplementary Movie 1**): (i) opening of the nucleotide  
107 binding cleft and (ii) slight flattening upon inclusion of  $Mg^{2+}$ , followed by twisting of the monomer  
108 upon completion of hydrolysis. A dataset comprising only *Plasmodium* actins shows a similar trend  
109 (**Fig. 2c-d**), although PC2 in this dataset depicts a change in SD2 and not so much in SD1, as in the  
110 full dataset (**Supplementary Movie 1**). The twist angles of the mass centers of the subdomains ( $\theta$ )

111 were used as an independent measure and showed angles of 19.0°, 17.9°, and 20.0° for Ca-ATP,  
112 Mg-ATP/ADP, and Mg-ADP structures, respectively (**Supplementary Table 4**). The opening-  
113 closing motion was not evident from distances of the mass centers of SD2 and SD4 ( $d_{2-4}$ ) or  
114 phosphate clamp distances ( $b_2$ ) as defined before<sup>19</sup>. However, anisotropic B-factors provided  
115 support for the opening, showing a directional destabilization of SD2 towards SD4  
116 (**Supplementary Fig. 3**). A comparable dataset of *Dictyostelium discoideum* actins is characterized  
117 in PCA by a combination of opening and twisting upon inclusion of Mg<sup>2+</sup> and a reversal of the  
118 opening upon completion of hydrolysis<sup>20</sup>.

119

### 120 ***PfActI* binds potassium during ATP hydrolysis**

121 In the mixed ATP/ADP structure of *PfActI*, we identified K<sup>+</sup> with a final refined occupancy of 0.7,  
122 which is close to the occupancy of ATP (0.8), between the side chain of Asp155, the backbone N of  
123 Gly157, and the backbone O of Val160 (**Fig. 1c** and **Supplementary Text**). The active site of actin  
124 is highly conserved, including the residues coordinating this K<sup>+</sup>. Yet, there is no evidence of K<sup>+</sup> or  
125 any other ions at this site in published actin structures, other than the Cd-ATP-*PfActI* structure<sup>21</sup>,  
126 where Cd was refined at this site. However, this site corresponds to one of the K<sup>+</sup>-binding sites in  
127 the homologous Hsc70 nucleotide-binding domain<sup>22</sup>. The Mg-ADP structure does not contain  
128 excess electron density or anomalous difference density at this site (**Fig. 1d**), despite showing  
129 anomalous difference density for the P $\alpha$  and P $\beta$  atoms of ADP. This suggests that K<sup>+</sup> leaves the  
130 active site upon P<sub>i</sub> release. Since K<sup>+</sup> does not activate P<sub>i</sub> release from *PfActI* (**Tables 1 and 2**), this  
131 interaction most likely does not directly influence the mechanism of P<sub>i</sub> release in *PfActI* but may  
132 rather be relevant for hydrolysis.

133

### 134 **Non-methylated His74 and Lys270 play ping-pong on the A-loop in *PfActI***

135 Three loops in the actin fold are considered primary sensors of the nucleotide state (**Fig. 1a**): the S-  
136 loop (residues 11-16<sup>23-25</sup>), the H-loop (residues 70-78<sup>24</sup>), and the G-loop (residues 154-161<sup>25</sup>).  
137 Other, more distant sensors of the nucleotide state are the W-loop (residues 165-172<sup>26</sup>), the D-loop  
138 (residues 38-52<sup>23-25</sup>), and the C terminus (residues 349-375<sup>27</sup>). The foremost nucleotide state sensor  
139 in canonical actins is Ser14, whose side chain rotates towards the  $\beta$ -phosphate of ADP upon P<sub>i</sub>

140 release. The conformation of the corresponding Ser15 in *PfActI* moves from the ATP-state<sup>8</sup> through  
141 a double conformation with occupancies 0.8/0.2 in the ATP/ADP-state to a complete ADP-  
142 conformation (**Fig. 1b-d**). This conformational switch is further propagated to the flipping of the  
143 peptide bond between Glu73 and His74 (**Supplementary Fig. 4**), as seen also in *PbActII* and the  
144 uncomplexed ATP and ADP structures of several actin structures<sup>20,23,25</sup>.

145 Asp180 is located in a short loop following  $\beta$ 14 (**Supplementary Fig. 5**), sandwiched between  
146 the H-loop and the plug residues, including Lys270 (**Figs. 1a and 3**). This loop, which we  
147 subsequently call the A-loop, serves as a linker between SD3 and SD4. In the Ca-ATP structure, the  
148 A-loop resides close to the H-loop (**Fig. 3a**). Asp180 is in two conformations: either interacting  
149 with the N $\delta$  of His74 (3.2 Å, conformation **1a**) or oriented towards Arg178 (conformation **1b**). In  
150 the Mg-ATP/ADP structure, the backbone of the A-loop has a second conformation (conformation  
151 **2a**) with an occupancy of 0.4 (**Fig. 3c**). In the Mg-ADP structure, only conformations **1b** and **2a** are  
152 present at equal occupancies. B-factors match the environment in both Mg structures  
153 (**Supplementary Fig. 6**), and the occupancies are in agreement with the estimated protonation state  
154 (55%, see **Supplementary Text**) of the histidine side chain. In conformation **2a**, Asp180 forms a  
155 salt bridge with Lys270. In conformation **1a**, Asp180 moves to form a salt bridge with His74. Thus,  
156 the A-loop is engaged in a ping-pong movement between the two positive charges. Conformation  
157 **1b** is analogous to the position of the side chain in the jasplakinolide-stabilized *PfActI* filament  
158 model (**Fig. 3g**) and in many canonical actin filament models<sup>9,28-30</sup>.

159 Most model actins, except for that of *Saccharomyces cerevisiae*, presumably have a methylated  
160 His74 (*PfActI* numbering) in the H-loop<sup>31</sup>, although this is not evident from the majority of  
161 structures in the PDB. Our crystal structures are of sufficiently high resolution to verify the  
162 previous observations that in native or recombinant *PfActI*, His74 is not methylated<sup>11,12</sup>. Curiously,  
163 recombinant *PbActII* expressed and purified similarly is methylated at this position  
164 (**Supplementary Fig. 2**). In actins with a methylated histidine at this site, N $\delta$  is mostly protonated  
165 and free to interact with the carbonyl of Gly159 (*PfActI* numbering), which together with Val160 is  
166 involved in coordinating the active site K<sup>+</sup> (**Fig. 1c**). As protonated histidines act as cations in  
167 electrostatic interactions and as  $\pi$ -systems in cation- $\pi$  interactions, protonation constitutes a credible  
168 interaction switch between His74<sup>+</sup>/Asp180<sup>-</sup> and His74/Arg178<sup>+</sup>, particularly for a non-methylated

169 histidine (55% protonated at pH 6 based on the typical  $pK_a$  of histidine side chains in solution). A  
170 methylated histidine in canonical actins and *PbActII* would favor interactions of the A-loop with the  
171 H-loop.

172 Arg178 in the A-loop participates in connecting the inner (ID) and outer (OD) domains. In the  
173 Mg-ATP/ADP structure, Arg178 moves towards the carbonyl groups of His74 and Pro110 in  
174 conformation **1b**, thus connecting the P-loop in SD1 (residues 109-114) and H-loop in SD2  
175 (**Supplementary Fig. 7**). Conversely in conformation **2a**, Arg178 interacts with His74 *via* a cation-  
176  $\pi$  interaction, which only maintains the contact between SD3 and SD2. Since the two conformations  
177 of the A-loop backbone (**1a/b** and **2a**) are evident in the presence of  $Mg^{2+}$  but not with  $Ca^{2+}$  and are  
178 still present in the Mg-ADP structure, the movement of the loop is either connected directly to  $Mg^{2+}$   
179 binding or is an indirect result facilitated by  $Mg^{2+}$  binding and the resulting accelerated  $P_i$  release.

180

### 181 **Structural differences in the Ca and Mg states of *PbActII***

182 According to PCA, Mg-ADP *PbActII* is less open and more twisted than the Ca-ATP form,  
183 situating towards the twinfilin-C complex<sup>32</sup> and the cofilin-decorated filament structure<sup>33</sup>.  
184 Measurements of  $\theta$ ,  $d_{2-4}$  and  $b_2$  support these findings (**Supplementary Table 3**). However, the  
185 largest changes appear in SD2, which has high B-factors and relatively weak electron density  
186 (**Supplementary Fig. 9**). The active site configurations in the Ca states are similar between *PfActI*  
187 and *PbActII* (**Fig. 1b, e**). However, in the presence of  $Mg^{2+}$ , the His161 side chain adopts a  
188 different conformation in *PbActII* than that seen in any of the structures of *PfActI* and most other  
189 gelsolin-bound structure in the PDB (**Fig. 1f**). The exception to this is the *D. discoideum* actin  
190 structure in the presence of Li-ATP (1NMD), where a similar conformation was proposed to be  
191 more amenable to hydrolytic activity<sup>34</sup>. However, the side chain is rotated 180° about the C $\beta$ -C $\gamma$   
192 bond in 1NMD compared to *PbActII* and most other actin structures. The new conformation of  
193 His161 in *PbActII* changes the water network by occupying the space of one of the waters  
194 coordinating the active site  $K^+$  in *PfActI*. In F-actin, His161 adopts a conformation similar to that  
195 seen in *PbActII* but even closer to  $P\gamma$ <sup>30,35</sup>.

196 There is no evidence of conformations **1a** or **2a** in the *PbActII* Mg-ADP structure (**Fig. 3h-i**).  
197 This can be rationalized as follows: (i) methylation of His73 ensures that it is mostly protonated and



198 therefore repels Arg177, (ii) Gly115 of *PfActI* is threonine in *PbActII*, and the G115A mutant also  
199 lacks conformation **2a** (see below), and (iii) Ala272 of *PfActI* is cysteine in *PbActII*, which may  
200 sterically block the backbone position of conformation **2a**. The fact that the alternative  
201 conformations of the A-loop have not been built in the majority of actin structures does not  
202 unambiguously prove that they would not exist, and indeed in several cases, this loop has high B-  
203 factors. However, based on available data, we expect that a stable conformation **2a** may be unique  
204 to *PfActI*, and that *PbActII* resembles canonical actins in this respect.

205

### 206 **Canonical-type K270M mutation in *PfActI* hyperactivates phosphate release and stabilizes** 207 **filaments**

208 We proposed earlier that differences in the plug region and especially Lys270 (corresponding to  
209 Met269 in  $\alpha$ -actin) are among the determining factors for *PfActI* filament instability<sup>9</sup>. As Asp180  
210 interacts with Lys270 directly, we generated a canonical-type K270M mutant. Indeed, this mutant  
211 formed many more long filaments in the absence of jasplakinolide than wild-type *PfActI*  
212 (**Supplementary Fig. 9**). Curiously, considering this stabilizing effect, the K270M mutation caused  
213 hyperactivation of the  $P_i$  release rate by  $Mg^{2+}$ . This activation effect was manifested by a reduction  
214 of the rate in Ca conditions to  $\alpha$ -actin levels and a moderate increase in Mg. Furthermore, in  
215 contrast to the wild type, K270M was no longer insensitive to  $K^+$  (**Table 1**) and also showed a lag  
216 phase at high concentration (**Supplementary Fig. 10a**), thus behaving essentially as  $\alpha$ -actin but  
217 with a faster rate in Mg and MgK conditions. As this mutation should make conformation **2a** less  
218 favorable by disrupting the interaction with Asp180, these results can be taken as indication that  
219 conformation **2a** is counterproductive to  $P_i$  release.

220

### 221 **Mutations affecting the conformational space of the A-loop affect phosphate release in *PfActI***

222 As the A-loop moves into conformation **2a** to interact with Lys270, it fills a space otherwise  
223 occupied by water molecules. On the opposite side, Ala272 points towards the A-loop (**Fig. 3a-g**).  
224 This alanine is conserved in TgAct and in nearly all alveolates, but is replaced by serine in most  
225 model actins and by cysteine in *PbActII* or asparagine in *Arabidopsis thaliana* ACT1  
226 (**Supplementary Fig. 5**). We reasoned that if the disappearance of the positive charge by the

227 K270M mutation changed the  $P_i$  release dramatically,  $P_i$  release might be directly related to the  
228 conformation of the A-loop. Thus, large side chains at position 272 that affect the movement of the  
229 A-loop should also modulate the  $P_i$  release rate. We therefore prepared A272C and A272W mutants  
230 - the first to provide a side chain of moderate size, also mimicking *PbActII*, and the second to block  
231 the movement of the loop completely, both presumably favoring conformation **1a/b**. The A272C  
232 mutant caused a moderate 5.1-fold activation upon  $Mg^{2+}$  binding, while the A272W mutant showed  
233 a large 18.9-fold activation and the largest observed rate ( $9.78 \pm 0.06 \times 10^{-4} s^{-1}$ ) in Mg conditions  
234 (**Table 1**).

235 The A272W structure in MgK conditions resembles overall the mixed structure ( $RMSD(C\alpha) =$   
236  $0.269$ ) more than the Mg-ADP structure ( $RMSD(C\alpha) = 0.410$ ) and is positioned close to the Ca-  
237 ATP structure in the PCA analysis. The A-loop is forced into conformation **1b** by the Trp272 side  
238 chain (**Fig. 3e**). Glu73 is in a double conformation, one similar to the Mg-ADP structure and  
239 another to that of the Mg-ATP/ADP structure (**Fig. 3e, Supplementary Fig. 4**). In addition to  
240 limiting the conformational space of the A-loop, Trp272 forces Lys270 away from the Asp180 side  
241 chain and towards the solvent, widening the gap between His74 and Lys270 from 7.7 to 10.4 Å and  
242 only slightly altering the conformation of residues Leu268-Asn281 ( $RMSD = 0.27$  Å, Mg-  
243 ATP/ADP-*PfActI* compared to Mg-ATP/ADP-*PfActI*-A272W) (**Fig. 3e**). The occupancy of ATP in  
244 the active site of this relatively fresh crystal is only 0.3 (**Supplementary Table 2**).

245 To generate a mutant that would favor conformation **2a** of the A-loop, we further prepared a  
246 neutralizing H74Q mutant, which negates the charge on the histidine side chain, forcing an  
247 unfavorable interaction of the glutamine with Asp180. This mutant was severely compromised in  
248 terms of  $P_i$  release, with  $\alpha$ -actin levels of  $P_i$  release in the Ca state ( $0.27 \pm 0.03 \times 10^{-4} s^{-1}$ ) and no  
249 activation by either  $Mg^{2+}$  or  $K^+$  or by using a higher protein concentration (**Table 1**). In this mutant  
250 (MgK conditions), the Asp180 side chain is oriented away from Gln74, which interacts with  
251 Arg178 (**Fig. 3f**). However, the backbone of the loop did not adopt conformation **2a**, and we  
252 therefore call this conformation **2b**, since the carboxylic acid group of the Asp180 side chain  
253 occupies the same space as that in conformation **2a**, preserving the interaction with Lys270 (**Fig.**  
254 **3f**).

255

## 256 **Arg184 interactions with the H-loop in subdomain 2**

257 Interactions across the interdomain cleft mediate twist angle stability and the openness of actin<sup>36</sup>.  
258 Upon ATP hydrolysis in *PfActI*, Glu73 in the H-loop undergoes a conformational shift, whereby  
259 the backbone is flipped and the sidechain orients towards the ID and interacts with Arg184 (**Fig.**  
260 **4b-d, Supplementary Fig. 4**). This conformational shift happens also in *PbActII* (**Fig. 4h-i**) and in  
261 several canonical actin structures<sup>20,23,25</sup>. In Ca-ATP-*PfActI*, Arg184 is engaged in a cation- $\pi$   
262 interaction with Tyr70. This interaction is preserved in the mixed structure, but is dissipated in the  
263 pure Mg-ADP state (**Fig. 4b-d**), after an interaction transfer of Arg184 from Tyr70 to the flipped  
264 backbone carbonyl of Glu73. In F-*PfActI*, the interaction between Arg184 and Glu73 is enhanced  
265 by a hydrogen bond between Arg184 and the Ile72 carbonyl. In the *PfActI* H74Q and A272W  
266 mutants, the conformations in this area resemble those of the Ca-ATP (in H74Q) and Mg-ADP (in  
267 A272W) states (**Fig. 4f-g, Supplementary Fig. 4**).

268

## 269 **The effects of canonical-type mutations in the D-loop on phosphate release**

270 The major substitutions in the D-loop of *PfActI* are Pro42, Glu49, and Phe54 (Gln41, Gly48, and  
271 Tyr53 in  $\alpha$ -actin) (**Supplementary Fig. 5**). Tyr53 is a conserved phosphoregulation site in  
272 canonical actins<sup>37</sup>, while the other two sites are interesting because of their possible conformational  
273 effects. These residues are invisible or only barely visible (in the case of Phe54) in the crystal  
274 structures. However, in the filament, the tip of the D-loop of *PfActI* differs from canonical actins<sup>9</sup>.  
275 We therefore measured  $P_i$  release rates for the mutants F54Y<sup>8</sup>, P42Q, E49G, and the double mutant  
276 P42Q/E49G of *PfActI*. P42Q and E49G showed opposite effects in  $Mg^{2+}$  activation with P42Q  
277 reducing and E49G increasing it, but both were similarly insensitive to  $K^+$  (**Table 1**). However, the  
278 negative effect of P42Q is due to an increase in the Ca rate compared to wild type, while the  
279 positive effect of E49G on  $Mg^{2+}$  activation is caused by both reduced rate in Ca and an increased  
280 rate in Mg. The double mutant has reduced  $Mg^{2+}$  activation with levels indistinguishable from wild-  
281 type, while still remaining insensitive to  $K^+$ . Thus, it seems to be dominated by the effect of E49G  
282 in the Ca state and shows a compounded negative effect that is not shown by either of the mutations  
283 alone.

284 At high concentration (10  $\mu\text{M}$ ), the F54Y mutation reduces the rate of hydrolysis in the Ca state  
285 to  $\alpha$ -actin levels<sup>8</sup>. Here, we measured the rates at a concentration of 1  $\mu\text{M}$ . The  $\text{Mg}^{2+}$  and  $\text{K}^{+}$ -  
286 activation levels of F54Y were similar to wild type, but the absolute rates were approximately  
287 doubled (**Table 1**). In the Ca condition, the F54Y mutant behaves similarly to P42Q (**Table 2**),  
288 while the rates in the Mg and MgK conditions were most similar to the E49G mutant. Thus, these  
289 canonical-type mutations in the D-loop area all have similar effects on  $\text{P}_i$  release. However, whereas  
290 P42Q and E49G directly affect the tip of the D-loop in the filament, F54Y presents no foreseeable  
291 structural changes besides the added H-bonds to Lys62 of monomer  $n$  and to Tyr170 of monomer  
292  $n-2$ .

293

#### 294 **G115A mutation structures the C terminus of *PfActI***

295 Gly115 in *PfActI* is located in the P-loop of SD1 and is Thr/Ser/Ala in other reference actins  
296 (**Supplementary Fig. 5**). Nearby, Pro110 interacts with Arg178 in conformation **1b** and the  
297 backbone flexibility conveyed by Gly115 could control the positioning of this interaction. We  
298 previously generated a mutant G115A that did not rescue long filament formation in the absence of  
299 jasplakinolide but showed slightly longer filaments than wild type in its presence<sup>8</sup>. We crystallized  
300 the mutant using the same conditions as the wild-type *PfActI* with either  $\text{Ca}^{2+}$  or  $\text{Mg}^{2+}$  to compare  
301 these structures. Unlike the wild-type (**Fig. 5a**), the C terminus of G115A is more ordered, with  
302 interpretable electron density up to Cys375 in the  $\text{Ca}^{2+}$  and up to His372 in the  $\text{Mg}^{2+}$  structure (**Fig.**  
303 **5b-c**). In contrast, all other structures of *PfActI* with the exception of H74Q and the *PbActI*- $\alpha$ -actin  
304 D-loop chimera<sup>8</sup> have a disordered C terminus after Ser366.

305 The G115A mutation straightens  $\alpha 3$  and moves the P-loop slightly away from the C terminus.  
306 This in turn favors a cation- $\pi$  interaction between Lys114 and His372 (3.7 Å) and a hydrogen bond  
307 between Glu118 and His372 (2.8 Å). In wild type, the position of Lys114 does not allow both  
308 interactions to take place simultaneously, which is the likely reason for the disordered C terminus  
309 (**Fig. 5a**). In filaments, this interaction is preserved with corresponding distances of 3.1 Å (Lys114-  
310 His372) and 3.0 Å (Glu118-His372) (**Fig. 5e**). *PbActII*, which has an ordered C terminus in both Ca  
311 and Mg states (**Fig. 5f**) has a threonine in the corresponding position 114. The distances from  
312 Lys113 and Glu117 to His372 are 2.7 Å and 5.0 Å in Mg-ADP-*PbActII*. The altered position of the

313 P-loop does not extend to Pro110, and therefore does not directly influence the interactions of  
314 Arg178 at the interface of SD1 and SD2. Trp357 and Phe353 are in a double conformation in both  
315 structures, the former facilitating a recently identified cation binding site<sup>38</sup>. The conformations **1a**  
316 and **1b** of the A-loop are evident in these structures, but conformation **2a** is not visible in the Mg<sup>2+</sup>  
317 structure. G115A has only slightly decreased P<sub>i</sub> release rates in Mg and MgK conditions (**Table 1**).

318

## 319 **DISCUSSION**

320 The large-scale conformational transition of the actin monomer from globular to filamentous form  
321 has been described from a series of high-resolution filament structures<sup>15,16,20,39</sup>. However,  
322 experimental evidence on what exactly triggers the structural transition and the subsequent  
323 activation of hydrolysis is still lacking. Key questions are: (i) Why does Mg-ATP actin polymerize  
324 more readily than Ca-ATP actin or Mg-ADP actin? (ii) What is the role of K<sup>+</sup> in polymerization and  
325 ATP hydrolysis? Unlike the most studied model actins, *PfActI* forms short oligomers also in  
326 classical non-polymerizing conditions in the presence of ADP and, on the other hand, stable dimers,  
327 in addition to short filamentous structures, in polymerizing conditions<sup>8,12</sup>. The filaments can be  
328 stabilized by jasplakinolide, such that a near-atomic resolution structure of the *PfActI* filament has  
329 been solved, providing hints to the structural features responsible for the inherent instability of the  
330 filaments<sup>9</sup>.

331 All structures reported here and our earlier *PfActI* Ca-ATP structure were obtained with K<sup>+</sup> in  
332 the crystallization solution, which provided direct evidence of Mg<sup>2+</sup>-dependent K<sup>+</sup> binding in the  
333 active site of *PfActI*. This is, to the best of our knowledge, the first experimental evidence of K<sup>+</sup> in  
334 the active site of actin. The presence of K<sup>+</sup> is in conjunction with the Mg-ATP state but not with Ca-  
335 ATP or Mg-ADP states. Thus, K<sup>+</sup> seems to be involved in hydrolysis and leave the active site  
336 together with the P<sub>i</sub>. Mg<sup>2+</sup> binding in the presence of K<sup>+</sup> causes a slight flattening and opening of  
337 the *PfActI* monomer, followed by a closing and twisting back upon hydrolysis. This slightly  
338 flattened conformation could be the explanation why Mg-K-ATP actin is the fastest polymerizing  
339 actin species<sup>6</sup>. Conversely, Mg-K-ADP actin polymerizes weakly in canonical systems<sup>6</sup>, and the  
340 twisting upon ATP hydrolysis, as seen for *PfActI*, may explain this. However, since the path of the  
341 G-F transition may have major intermediates that are off the linear path and cannot be captured by

342 crystallographic analysis, the validity of the connection between polymerization propensity and  
343 twist of a G-actin structure remains to be confirmed. It should also be noted that the response of  
344 *PfActI* to ADP differs from canonical actins<sup>8</sup>.

345 A structural homolog of actin, Hsc70, has a conserved K<sup>+</sup> binding site at the same location as  
346 *PfActI*<sup>22</sup>. The activity of Hsc70 decreases slightly in the presence of ammonium<sup>40</sup>, which is in line  
347 with our previous finding that CH<sub>3</sub>COONH<sub>4</sub> is able to “protect” *PfActI* from oligomerization,  
348 which in turn is dependent on ATP hydrolysis<sup>8,12</sup>. However, since *PfActI* did not respond to K<sup>+</sup> in P<sub>i</sub>  
349 release assays, the exact role of the active site K<sup>+</sup> in P<sub>i</sub> release remains to be investigated. The  
350 positive charge on the K<sup>+</sup> may play a role in orientation of the  $\gamma$ -phosphate or the catalytic water or  
351 charge complementation of its conjugate base OH<sup>-</sup> in the reaction pathway, as has been suggested  
352 for Hsc70<sup>41</sup>. Unlike Hsc70 however, the presence of K<sup>+</sup> is not mandatory for hydrolysis in *PfActI*.  
353 Yet, its presence may challenge previous hydrolysis mechanisms proposed based on  
354 simulations<sup>42,43</sup>.

355 The interplay between the H-loop, the A-loop and the plug is complex, but our data provide  
356 important insights into how the movement of this triad connects to the mechanism of P<sub>i</sub> release and  
357 polymerization. P<sub>i</sub> release is strongly influenced by the conformational distribution of the A-loop  
358 into the two configurations **1a/b** and **2a/b** as we show by P<sub>i</sub> release measurements (**Tables 1 and 2**)  
359 and structures (**Fig. 2**). Conformation **2b** is counterproductive to P<sub>i</sub> release, while elimination of **2a**  
360 by steric hindrance (as in the mutants A272W and A272C) or by charge neutralization (K270M)  
361 favors P<sub>i</sub> release, suggesting that interactions of the A-loop with the H-loop and the P-loop are  
362 required for native activity levels. *In vivo*, mutation K270M is lethal in the blood stages of parasite  
363 life cycle<sup>44</sup>. Methylation of His73/74 and the resulting change in side chain charge distribution is a  
364 key modulator of P<sub>i</sub> release. A methylated histidine, as found in most actins, is ~11-fold less  
365 protonated in the cellular pH than a non-methylated histidine would be. The only other species with  
366 a non-methylated histidine at this position and for which there are structures available is *S.*  
367 *cerevisiae*, which like *PfActI* has a shorter lag phase of polymerization and no lag in phosphate  
368 release upon polymerization<sup>45</sup>. However, in *ScAct*, conformation **2a/b** is not present, possibly due  
369 to the presence of Leu269 and Ala114 instead of Lys270 and Gly115<sup>46</sup>.

370 F-actin-like interactions in the activated Mg-ATP state can be considered favorable for  
371 polymerization. We consider interactions spanning the cleft between ID and OD on the back face of  
372 the monomer the most favorable for flattening and therefore nucleation and polymerization. There  
373 are only two such interaction sites: (i) between Arg184 of SD4 and Tyr70 and Glu73 of SD2 (**Fig.**  
374 **3**) and (ii) between Arg178 of SD3 and Pro110 and His74 of SD1 and SD2, respectively  
375 (**Supplementary Fig. 8**). In (i), the interaction of Arg184 via a cation- $\pi$  interaction to Tyr70 is  
376 supplemented by an ionic bond with Glu73 in the Mg-ATP/ADP structure, followed by pulling of  
377 the Glu73 towards SD2 and a consequent hydrogen bond to the backbone of Ile72 in the F state.  
378 Yet, while the polymerization rate of the  $\beta$ -actin R183W mutant was significantly decreased<sup>36</sup>, the  
379  $\alpha$ -actin R183G mutant displayed unaltered polymerization kinetics<sup>47</sup>. In (ii), the Arg178 interaction  
380 is absent in Ca-ATP actin, but present in conformation **1b** of Mg-ATP/ADP-*PfActI*. The interaction  
381 is preserved between His74 and Arg178, and further strengthened by hydrogen bonding to the  
382 carbonyl of Leu111. An R177H mutant in yeast actin results in an extended lag phase in  
383 polymerization<sup>48</sup>, which corroborates that this interaction promotes nucleation. Arg177 is also the  
384 site for polymerization-inhibiting ADP-ribosylation by iota toxins<sup>49,50</sup>.

385 The two substitutions in D-loop (Pro42 and Glu49 in *PfActI*) provide one explanation to the  
386 unstable nature of *PfActI*. These mutations favor the unstable closed D-loop conformation<sup>30</sup> to such  
387 an extent that even in the presence of jasplakinolide, which forces the stable open D-loop  
388 conformation in  $\alpha$ -actin, the *PfActI* filament adopts the closed conformation<sup>9</sup>. Pro42 and Glu49 are  
389 in close proximity to the stiffness and polymerization cation sites<sup>51</sup>, which in turn are close to two  
390 substitutions in *PfActI*, namely Gly200 and Phe54. Together they participate in a complex interplay  
391 that is likely one of the major components of filament instability in *PfActI*. As  $P_i$  release of E49G is  
392 activated by  $Mg^{2+}$  2.2-fold more than wild type, while the activation of P42Q/E49G and P42Q is  
393 equal or less, respectively, one can conclude that these mutations are complementary to each other  
394 and that conformational restrictions of the D-loop and  $P_i$  release rates are reciprocally connected.  
395 Like K270M, the mutation P42Q is lethal *in vivo*<sup>44</sup>. Additionally, the effects of the F54Y mutation  
396 on overall rates (but not the activation) show that this mutation has a role beyond post-translational  
397 modifications. Interestingly, structural information on  $P_i$  release seems to be “erased” from  $\alpha$ -actin  
398 filaments by jasplakinolide, which is attributed to the D-loop conformation<sup>30</sup>. The success in

399 preparing *PfActI* filaments for cryo-EM by adding jasplakinolide into filaments after polymerizing  
400 to equilibrium<sup>9</sup> shows that the direct binding effects of jasplakinolide can overcome the effects of  
401 the constantly closed conformation of the D-loop.

402 Apicomplexan microfilaments are short but display a relatively normal critical concentration of  
403 polymerization, which means that the filament length distribution must result from the  
404 overabundance of nucleation, fragmentation, or both. Since the lag phase is very short<sup>12</sup>, increased  
405 nucleation likely contributes. However, we believe fragmentation is also important. The K270M  
406 mutant forms long helical filaments, releases phosphate quantitatively faster and qualitatively  
407 similar to  $\alpha$ -actin, and importantly, disfavors conformation **2a** of the A-loop. This conformation is  
408 not seen in the filament model, likely because jasplakinolide binds both Arg178 and Asp180, fixing  
409 them in a stable conformation. In its absence, the filament structure would permit this conformation.  
410 Based on our observations, we propose a model for *PfActI* fragmentation (**Fig. 6**). In this model,  
411 conformation **2a** in the naked *PfActI* filament severs the contact between the ID and OD, leading to  
412 destabilization of the monomer twist and filament contacts, eventually causing a break in the  
413 filament. The model provides an alternative, perhaps complementary explanation to the electrostatic  
414 effects we presented based on the filament model<sup>9</sup> and would explain the increased pelleting of  
415 native *PfActI* at low pH<sup>7</sup>. There are no known actin-binding proteins that can directly affect this  
416 region of the filament, suggesting that this mechanism could be a major intrinsic determinant of  
417 filament lengths *in vivo*. Importantly, while less favorable due to increased protonation of the  
418 methylated His73, the lack of attraction between Asp179 and Met269 and the apparent absence of  
419 conformation **2a** caused by the G115A substitution, the proposed mechanism could work also in  
420 canonical actins. As crystal structures represent low-energy states, it is possible that fragmentation  
421 in canonical actins proceeds through the same mechanism, simply less frequently.

422

## 423 **ONLINE METHODS**

### 424 **Mutagenesis**

425 *PfActI* mutants were generated by site-directed mutagenesis as described for F54Y and G115A<sup>8</sup>.  
426 Mutants A272W, A272C, H74Q, P42Q, E49G, and P42Q/E49G were prepared using similar  
427 methods as before, with different primers. All mutants were confirmed by capillary sequencing at



428 the Biocenter Oulu Sequencing Core or at the Center for Medical Genetics and Molecular  
429 Medicine, Haukeland University Hospital, Bergen.

430

### 431 **Protein expression and purification**

432 Wild-type and mutant *Plasmodium* actins were purified as described<sup>8,12</sup>. Briefly, insect cell  
433 expressed His-tagged *Plasmodium* actins were purified using Ni-NTA affinity chromatography,  
434 cleaved with a recombinantly expressed protease (tobacco etch virus protease [TEV] for *PfActI*,  
435 rhinoviral 3C protease for *PbActII*) and passed through a second Ni-NTA column to remove the  
436 His-tag and uncleaved protein and finalized by gel filtration over a Superdex 200 column. Mouse  
437 gelsolin segment 1 was purified as described<sup>52</sup> and included in actin samples (where applicable)  
438 before gel filtration at a 1.2-fold molar excess.

439

### 440 **Phosphate release assays**

441  $P_i$  release was measured using the sensitive 7-diethylamino-3-[N-(2-  
442 maleimidoethyl)carbamoyl]coumarin-labeled phosphate-binding protein (MDCC-PBP)  
443 biosensor<sup>53,54</sup> that produces a fluorescence signal upon  $P_i$  binding. To reduce  $P_i$ , ATP and ADP  
444 background, monomeric actins used for  $P_i$  release assays were pre-treated with DOWEX 1X8 resin  
445 (Sigma) equilibrated with  $G_0$  buffer (10 mM HEPES pH 7.5, 0.2 mM  $CaCl_2$ , 0.5 mM TCEP) for 3  
446 min at 298 K, and further diluted using  $G_0$  buffer to 1.6-fold higher concentration than that used for  
447 measurements. Before initiating the kinetic measurements, components for the different conditions  
448 were supplied as 8-fold concentrated stocks such that the desired final concentrations of all  
449 components were reached. Final compositions of the three conditions were 10 mM HEPES pH 7.5,  
450 0.2 mM  $CaCl_2$ , 0.5 mM TCEP, 50  $\mu$ M ATP (Ca condition), Ca condition with added 1 mM  $MgCl_2$   
451 (Mg condition), and Ca condition with added 4 mM  $MgCl_2$ , 1 mM EGTA, and 50 mM KCl (MgK  
452 condition). Fluorescence vs. time data were converted to  $\mu$ M  $P_i$  by linear interpolation of a standard  
453 series and analyzed by linear regression at the linear portion of the kinetic curve. The slope of the  
454 regression line was then divided by the protein concentration measured after DOWEX treatment to  
455 yield the final rates.

456 In the presence of Mg and in MgK,  $\alpha$ -actin displays an initial lag phase, followed by an  
457 exponential  $P_i$  release curve which, at high concentrations, plateaus close to the upper limit of the  
458 linear range of the system (**Supplementary Fig. 1**). We therefore decided to consider only the first  
459 two phases for our analyses. We further calculated the activation of  $P_i$  release by  $Mg^{2+}$  and by  $K^+$  by  
460 dividing the Mg rate by the Ca rate in the former and the MgK rate by the Mg rate in the latter.  
461 These ratios are a sensitive measure for comparing actins to one another, since they are insensitive  
462 to changes in residual nucleotide contamination in the samples. These contaminants are of the order  
463 of <10% of the 50  $\mu$ M ATP added to each reaction. Since the total nucleotide concentration is in a  
464 >50-fold excess over the nM-range dissociation constant of ATP to actin<sup>55</sup>, we assume that in the  
465 assay, actin is saturated and not affected by small fluctuations in the nucleotide concentration.

466

#### 467 **Electron microscopy**

468 *PfActI* wild-type and mutant samples were polymerized for 16 h at 298 K at a concentration of  
469 20  $\mu$ M in F-buffer. Prior to application on carbon-coated 200 mesh Cu-grids (Electron Microscopy  
470 Sciences), samples were diluted to a final concentration of 1  $\mu$ M and immediately applied on the  
471 grids. Samples were incubated for 60 s on the grids, dried from the side using pre-wetted Whatman  
472 paper, washed with three drops of F-buffer, then stained with 2% uranyl acetate first for 2 s and  
473 then for 60 s in a fresh drop, before drying from the side as before and then dried in air. Grids were  
474 imaged using a Jeol JEM-1230 microscope operated at 80 kV and with a final pixel size of 1.22 nm.

475

#### 476 **Protein crystallization**

477 *PfActI*-G1 and *PbActII*-G1 complexes in the Mg state were prepared essentially as described<sup>21</sup>,  
478 with the exception that  $CdCl_2$  was replaced by 1 mM  $MgCl_2$ . In some cases, crystals were grown by  
479 streak seeding as described<sup>21</sup>, and in others, crystals were obtained directly from optimization  
480 screens without seeding. Cryoprotection was achieved by soaking for 5-30 s using the same  
481 condition as for the crystallization with a higher precipitant concentration (PEG3350, 22-28%) and  
482 PEG400 at 10-20% as the cryoprotectant. Protein buffer components were also included in the  
483 cryosolutions at concentrations of 1 mM  $MgCl_2$ , 0.5 mM ADP, and 0.5 mM TCEP for the Mg  
484 conditions and 0.2 mM  $CaCl_2$ , 0.5 mM ATP, and 0.5 mM TCEP for the Ca conditions. The pH of

485 the crystallization reservoir buffer (0.1 M Bis-Tris) varied from 5.8 to 6.5. Mg-ADP-*PfActI*-G1  
486 crystals were cryoprotected in a solution containing 50 mM potassium phosphate. Mg-ADP- $\text{AlF}_n$ -  
487 *PfActI*-G1 crystals were prepared by adding a solution of 20% PEG3350, 0.1 M Bis-Tris pH 6.0,  
488 0.2 M KSCN, and 1 mM  $\text{AlF}_n$  solution directly into the drops and incubated for a few minutes  
489 before cryoprotection with a solution as described above. The  $\text{AlF}_n$  solution consisted of pre-mixed  
490  $\text{AlCl}_3$  and NaF in a 1:4 molar ratio. The minimum time between data collection from a crystal  
491 yielding structures with ATP/ADP mixtures and ADP-only was 6 months for Mg-*PfActI*-F54Y  
492 crystals, while the time from crystallization to data collection from Mg-*PbActII* was only 2 weeks.  
493

#### 494 **Diffraction data collection, processing, and structure refinement**

495 Crystallization data was collected at 100 K at several beamlines. Mg-ATP/ADP-*PfActI*, Mg-ADP-  
496  $\text{P}_i$ -*PfActI*, Mg-ADP-F54Y, and Mg-*PbActII* were collected at beamline P13 of PETRA III, DESY  
497 (Hamburg, Germany), Ca-F54Y and Mg- $\text{AlF}_n$ -F54Y at I24 of Diamond Light Source (Didcot, UK),  
498 Mg-F54Y, Mg-H74Q, and Mg-A272W at I04-1 of Diamond Light Source (Didcot, UK), Ca-G115A  
499 at ID23-1 of ESRF (Grenoble, France), and Mg-G115A at MX-14.1 of BESSY (Berlin, Germany).  
500 Diffraction images were processed using the XDS package<sup>56</sup>. Structure determination and  
501 refinement were carried out using programs of the PHENIX suite<sup>57</sup>. Initial phases were found by  
502 molecular replacement with PHASER<sup>58</sup>, using the Ca-ATP-*PfActI*-G1 structure (PDB ID 4CBU) as  
503 the search model for the *PfActI* structures and the Ca-ATP-*PbActI*-G1 structure (PDB ID 4CBX)  
504 for the *PbActII* structure. Additionally, MR-SAD using Autosol<sup>59</sup> was used to reduce model bias in  
505 the Mg-ADP- $\text{AlF}_n$ -F54Y structure. Structure refinement was carried out using phenix.refine<sup>60</sup>.

506

#### 507 **Principal component analysis**

508 There are two main structural rearrangements recognized in actin: the twistedness of the two main  
509 domains (SD1-2 and SD3-4) along an axis that pierces SD1 and SD3 at their respective centers and  
510 the openness of the nucleotide binding cleft as a rotation around an axis perpendicular to the twist  
511 axis and to the plane of the F-actin monomer. We analyzed 147 unique actin structures found in the  
512 protein data bank (PDB) using BIO3D<sup>61</sup> at resolution  $\leq 4\text{\AA}$  together with the structures reported  
513 here, and found that these movements are captured well by principal component analysis (PCA) in

514 PC1 (twistedness) and PC2 (openness) that contain 78% of total variance (**Supplementary Movie**  
515 **1**). All actin chains were aligned on a common core before PCA analysis. In a plot of PC1 vs. PC2  
516 (**Fig. 5a-b**), most actin structures cluster at the center of the plot. This large cluster contains all  
517 structures reported in this paper. Several outliers to this large cluster form their own distinct groups.  
518 Filament structures cluster at low twistedness and average openness, open profilin-actin structures  
519 cluster at high openness and average twistedness, free G-actin structures cluster at high twistedness  
520 and average openness and finally ADF/cofilin bound actin structures cluster at high twistedness and  
521 low openness. We also analyzed *Plasmodium* actin structures as their own set by similar PCA  
522 analysis. PC1 and PC2 contain 84% of total variance in this dataset and their trajectories are toned-  
523 down versions of the twistedness and openness of the full dataset (**Supplementary Movie 1**). While  
524 PC1 in the limited dataset can easily be recognized as the twisting motion of the full dataset (due to  
525 the presence of the F-*PfActI* model), the opening-closing motion is slightly ambiguous (due to the  
526 lack of an open *PfActI* model), and is therefore indicated with an asterisk.

527

## 528 **Domain motion analysis**

529 To support the PCA analysis, we measured three parameters of four sets of structures: the domain  
530 distance between SD2 and SD4 ( $d_{2-4}$ ), the phosphate clamp distance ( $b_2^{19}$ ) and the torsion angle  
531 defined by all four subdomains ( $\theta$ ). The  $d_{2-4}$  distance was measured by a distance between the mass  
532 centers of the C $\alpha$  atoms of residues 35-39, 52-73 for SD2 and 183-269 for SD4. The phosphate  
533 clamp distance was measured as the distance between  $\alpha$ -carbons of Gly16 and Asp158. The torsion  
534 angle  $\theta$  was measured using the mass centers of  $\alpha$ -carbons from all four domains using the residue  
535 assignment defined above for SD2 and SD4, as well as residues 6-32, 77-137, 340-366 for SD1 and  
536 140-182, 270-337 for SD3. The models used were (i) Wild-type *PfActI* structures in the Ca-ATP,  
537 Mg-ATP/ADP, Mg-ADP and F-ADP states, (ii) *PfActI* F54Y structures in Ca-ATP, Mg-ADP-AlF<sub>3</sub>,  
538 and Mg-ADP, (iii) *PbActII* structures in Ca-ATP and Mg-ADP states and (iv) *D. discoideum* actin  
539 structures of mutant E205A/R206A/E207A/P109I in Ca-ATP and Mg-ATP and mutant  
540 E205A/R206A/E207A/P109A in Ca-ATP and Mg-ADP. Results are presented in **Supplementary**  
541 **Table 4**. For the *D. discoideum* structures, all residue assignments are -1 relative to the numbers

542 presented above. For *PbActII*, residue assignments for residue numbers smaller than 232 were -1  
543 relative to *PfActI* and others as for *PfActI*.

544

## 545 **ACKNOWLEDGMENTS**

546 We are grateful for the skillful assistance of Ju Xu and Dr. Juha Vahokoski in constructing some of  
547 the *PfActI* mutants, Dr. Henni Piirainen for help with the purification of some of them, Dr. Juha  
548 Kallio for help with data collection and Arne Raasakka for critical reading of the manuscript. We  
549 acknowledge Dr. Martin R. Webb from the Francis Crick Institute for providing the MDCC-PBP  
550 plasmid. We thank the Biocenter Oulu Electron Microscopy core facility, in particular Dr. Ilkka  
551 Miinalainen, as well as the Molecular Imaging Center, University of Bergen, in particular Dr. Endy  
552 Spriet, for assistance with electron microscopy. We also thank the Biocenter Oulu Proteomics and  
553 Protein Analysis core facility and Dr. Ulrich Bergmann for assistance with mass spectrometry. We  
554 also acknowledge the use of the Diamond Light Source beamlines I24 and I04-1, the European  
555 Synchrotron Radiation Facility beamline ID23-1, the European Molecular Biology  
556 Laboratory/German Electron Synchrotron beamline P13 on PETRA III, and the Berliner  
557 Elektronenspeicherring-Gesellschaft für Synchrotronstrahlung beamline MX-14.1 and thank the  
558 facilities for excellent user support during data collection for the structures published here. This  
559 work was funded by the Academy of Finland, the Emil Aaltonen Foundation, the Jane and Aatos  
560 Erkko Foundation, the Norwegian Research Council, and the Sigrid Jusélius Foundation.

561

## 562 **AUTHOR CONTRIBUTIONS**

563 E.-P.K. performed all experimental work, with the exception of the following: A.J.L. and L.T.  
564 prepared the wild-type and the K270M mutant actins for electron microscopy experiments and  
565 performed them and H.H. refined three of the mutant structures (F54Y/Ca-ATP, A272W, and  
566 H74Q). E.-P.K. and I.K. designed the study and wrote the manuscript. All authors participated in  
567 analyzing the data and read and approved the manuscript.

568

## 569 **COMPETING FINANCIAL INTERESTS**

570 The authors declare no competing financial interests.

571

## 572 DATA AVAILABILITY

573 The structures have been deposited in the PDB with the codes 6I4D, 6I4E, 6I4F, 6I4G, 6I4H, 6I4I,  
574 6I4J, 6I4K, 6I4L, and 6I4M. All other data that support the findings of this study are available from  
575 the corresponding author upon reasonable request.

576

## 577 REFERENCES

- 578 1. Titus, M. A. Myosin-Driven Intracellular Transport. *Cold Spring Harb. Perspect. Biol.* **10**,  
579 a021972 (2018).
- 580 2. Svitkina, T. The Actin Cytoskeleton and Actin-Based Motility. *Cold Spring Harb. Perspect.*  
581 *Biol.* **10**, a018267 (2018).
- 582 3. Glotzer, M. Cytokinesis in Metazoa and Fungi. *Cold Spring Harb. Perspect. Biol.* **9**, a022343  
583 (2017).
- 584 4. Sweeney, H. L. & Holzbaaur, E. L. F. Motor Proteins. *Cold Spring Harb. Perspect. Biol.* **10**,  
585 a021931 (2018).
- 586 5. Pollard, T. D. Actin and Actin-Binding Proteins. *Cold Spring Harb. Perspect. Biol.* **8**,  
587 a018226 (2016).
- 588 6. Pollard, T. D. Rate constants for the reactions of ATP- and ADP-actin with the ends of actin  
589 filaments. *J. Cell Biol.* **103**, 2747–54 (1986).
- 590 7. Schmitz, S. *et al.* Malaria parasite actin polymerization and filament structure. *J. Biol. Chem.*  
591 **285**, 36577–85 (2010).
- 592 8. Vahokoski, J. *et al.* Structural Differences Explain Diverse Functions of Plasmodium Actins.  
593 *PLoS Pathog.* **10**, e1004091 (2014).
- 594 9. Pospich, S. *et al.* Near-atomic structure of jasplakinolide-stabilized malaria parasite F-actin  
595 reveals the structural basis of filament instability. *Revis. Manuscr. Submitt.* (2017).
- 596 10. Skillman, K. M. *et al.* The unusual dynamics of parasite actin result from isodesmic  
597 polymerization. *Nat. Commun.* **4**, 2285 (2013).
- 598 11. Schmitz, S. *et al.* Malaria parasite actin filaments are very short. *J. Mol. Biol.* **349**, 113–25  
599 (2005).
- 600 12. Kumpula, E.-P. *et al.* Apicomplexan actin polymerization depends on nucleation. *Sci. Rep.* **7**,  
601 12137 (2017).
- 602 13. Wriggers, W. & Schulten, K. Stability and dynamics of G-actin: back-door water diffusion  
603 and behavior of a subdomain 3/4 loop. *Biophys. J.* **73**, 624–639 (1997).
- 604 14. Wriggers, W. & Schulten, K. Investigating a back door mechanism of actin phosphate release  
605 by steered molecular dynamics. *Proteins* **35**, 262–73 (1999).
- 606 15. Oda, T., Iwasa, M., Aihara, T., Maéda, Y. & Narita, A. The nature of the globular- to fibrous-  
607 actin transition. *Nature* **457**, 441–445 (2009).
- 608 16. Fujii, T., Iwane, A. H., Yanagida, T. & Namba, K. Direct visualization of secondary  
609 structures of F-actin by electron cryomicroscopy. *Nature* **467**, 724–728 (2010).
- 610 17. Schmoller, K. M., Niedermayer, T., Zensen, C., Wurm, C. & Bausch, A. R. Fragmentation is  
611 crucial for the steady-state dynamics of actin filaments. *Biophys. J.* **101**, 803–8 (2011).
- 612 18. Melki, R., Fievez, S. & Carlier, M.-F. Continuous Monitoring of P<sub>i</sub> Release Following  
613 Nucleotide Hydrolysis in Actin or Tubulin Assembly Using 2-Amino-6-mercapto-7-  
614 methylpurine Ribonucleoside and Purine-Nucleoside Phosphorylase as an Enzyme-Linked  
615 Assay<sup>†</sup>. *Biochemistry* **35**, 12038–12045 (1996).
- 616 19. Dalhaimer, P., Pollard, T. D. & Nolen, B. J. Nucleotide-mediated conformational changes of  
617 monomeric actin and Arp3 studied by molecular dynamics simulations. *J. Mol. Biol.* **376**,  
618 166–83 (2008).
- 619 20. Murakami, K. *et al.* Structural basis for actin assembly, activation of ATP hydrolysis, and  
620 delayed phosphate release. *Cell* **143**, 275–87 (2010).
- 621 21. Panneerselvam, S., Kumpula, E.-P., Kursula, I., Burkhardt, A. & Meents, A. Rapid cadmium

- 622 SAD phasing at the standard wavelength (1 Å). *Acta Crystallogr. Sect. D Struct. Biol.* **73**,  
623 581–590 (2017).
- 624 22. Wilbanks, S. M. & McKay, D. B. How potassium affects the activity of the molecular  
625 chaperone Hsc70. II. Potassium binds specifically in the ATPase active site. *J. Biol. Chem.*  
626 **270**, 2251–7 (1995).
- 627 23. Otterbein, L. R., Graceffa, P. & Dominguez, R. The crystal structure of uncomplexed actin in  
628 the ADP state. *Science* **293**, 708–11 (2001).
- 629 24. Graceffa, P. & Dominguez, R. Crystal structure of monomeric actin in the ATP state.  
630 Structural basis of nucleotide-dependent actin dynamics. *J. Biol. Chem.* **278**, 34172–80  
631 (2003).
- 632 25. Rould, M. A., Wan, Q., Joel, P. B., Lowey, S. & Trybus, K. M. Crystal structures of  
633 expressed non-polymerizable monomeric actin in the ADP and ATP states. *J. Biol. Chem.*  
634 **281**, 31909–19 (2006).
- 635 26. Kudryashov, D. S., Grintsevich, E. E., Rubenstein, P. A. & Reisler, E. A nucleotide state-  
636 sensing region on actin. *J. Biol. Chem.* **285**, 25591–601 (2010).
- 637 27. Strzelecka-Gołaszewska, H., Mossakowska, M., Woźniak, A., Moraczewska, J. &  
638 Nakayama, H. Long-range conformational effects of proteolytic removal of the last three  
639 residues of actin. *Biochem. J.* **307 ( Pt 2)**, 527–34 (1995).
- 640 28. von der Ecken, J., Heissler, S. M., Pathan-Chhatbar, S., Manstein, D. J. & Raunser, S. Cryo-  
641 EM structure of a human cytoplasmic actomyosin complex at near-atomic resolution. *Nature*  
642 **534**, 724–8 (2016).
- 643 29. Menten, A. *et al.* High-resolution cryo-EM structures of actin-bound myosin states reveal the  
644 mechanism of myosin force sensing. *Proc. Natl. Acad. Sci. U. S. A.* **115**, 1292–1297 (2018).
- 645 30. Merino, F. *et al.* Structural transitions of F-actin upon ATP hydrolysis at near-atomic  
646 resolution revealed by cryo-EM. *Nat. Struct. Mol. Biol.* **25**, 528–537 (2018).
- 647 31. Yao, X., Grade, S., Wriggers, W. & Rubenstein, P. A. His(73), often methylated, is an  
648 important structural determinant for actin. A mutagenic analysis of HIS(73) of yeast actin. *J.*  
649 *Biol. Chem.* **274**, 37443–9 (1999).
- 650 32. Paavilainen, V. O., Oksanen, E., Goldman, A. & Lappalainen, P. Structure of the actin-  
651 depolymerizing factor homology domain in complex with actin. *J. Cell Biol.* **182**, 51–59  
652 (2008).
- 653 33. Tanaka, K. *et al.* Structural basis for cofilin binding and actin filament disassembly. *Nat.*  
654 *Commun.* **9**, 1860 (2018).
- 655 34. Vorobiev, S. *et al.* The structure of nonvertebrate actin: implications for the ATP hydrolytic  
656 mechanism. *Proc. Natl. Acad. Sci. U. S. A.* **100**, 5760–5 (2003).
- 657 35. Chou, S. Z. & Pollard, T. D. Mechanism of actin polymerization revealed by cryo-EM  
658 structures of actin filaments with three different bound nucleotides. *bioRxiv* 309534 (2018).  
659 doi:10.1101/309534
- 660 36. Hundt, N. *et al.* Molecular mechanisms of disease-related human β-actin mutations p.R183W  
661 and p.E364K. *FEBS J.* **281**, 5279–91 (2014).
- 662 37. Baek, K. *et al.* Modulation of actin structure and function by phosphorylation of Tyr-53 and  
663 profilin binding. *Proc. Natl. Acad. Sci. U. S. A.* **105**, 11748–53 (2008).
- 664 38. Scipion, C. P. M. *et al.* Structural evidence for the roles of divalent cations in actin  
665 polymerization and activation of ATP hydrolysis. *Proc. Natl. Acad. Sci. U. S. A.* **115**, 10345–  
666 10350 (2018).
- 667 39. von der Ecken, J. *et al.* Structure of the F-actin–tropomyosin complex. *Nature* **519**, 114–117  
668 (2014).
- 669 40. O’Brien, M. C. & McKay, D. B. How potassium affects the activity of the molecular  
670 chaperone Hsc70. I. Potassium is required for optimal ATPase activity. *J. Biol. Chem.* **270**,  
671 2247–50 (1995).
- 672 41. Boero, M., Ikeda, T., Ito, E. & Terakura, K. Hsc70 ATPase: an insight into water dissociation  
673 and joint catalytic role of K<sup>+</sup> and Mg<sup>2+</sup> metal cations in the hydrolysis reaction. *J. Am.*  
674 *Chem. Soc.* **128**, 16798–807 (2006).
- 675 42. McCullagh, M., Saunders, M. G. & Voth, G. A. Unraveling the mystery of ATP hydrolysis  
676 in actin filaments. *J. Am. Chem. Soc.* **136**, 13053–8 (2014).
- 677 43. Akola, J. & Jones, R. O. Density Functional Calculations of ATP Systems. 2. ATP  
678 Hydrolysis at the Active Site of Actin. *J. Phys. Chem. B* **110**, 8121–8129 (2006).
- 679 44. Douglas, R. G. *et al.* Inter-subunit interactions drive divergent dynamics in mammalian and

- 680 Plasmodium actin filaments. *PLoS Biol.* **16**, e2005345 (2018).
- 681 45. Ti, S.-C. & Pollard, T. D. Purification of actin from fission yeast *Schizosaccharomyces*  
682 *pombe* and characterization of functional differences from muscle actin. *J. Biol. Chem.* **286**,  
683 5784–92 (2011).
- 684 46. Vorobiev, S. *et al.* The structure of nonvertebrate actin: implications for the ATP hydrolytic  
685 mechanism. *Proc. Natl. Acad. Sci. U. S. A.* **100**, 5760–5 (2003).
- 686 47. Miller, B. M. & Trybus, K. M. Functional effects of nemaline myopathy mutations on human  
687 skeletal alpha-actin. *J. Biol. Chem.* **283**, 19379–88 (2008).
- 688 48. Wen, K.-K. & Rubenstein, P. A. Biochemical consequences of the cardiofunk (R177H)  
689 mutation in yeast actin. *J. Biol. Chem.* **278**, 48386–94 (2003).
- 690 49. Vandekerckhove, J., Schering, B., Bärman, M. & Aktories, K. Clostridium perfringens iota  
691 toxin ADP-ribosylates skeletal muscle actin in Arg-177. *FEBS Lett.* **225**, 48–52 (1987).
- 692 50. Aktories, K. *et al.* Botulinum C2 toxin ADP-ribosylates actin. *Nature* **322**, 390–2 (1986).
- 693 51. Kang, H., Bradley, M. J., Elam, W. A. & De La Cruz, E. M. Regulation of actin by ion-  
694 linked equilibria. *Biophys. J.* **105**, 2621–8 (2013).
- 695 52. Bhargav, S. P., Vahokoski, J., Kumpula, E.-P. & Kursula, I. Crystallization and preliminary  
696 structural characterization of the two actin isoforms of the malaria parasite. *Acta Crystallogr.*  
697 *Sect. F. Struct. Biol. Cryst. Commun.* **69**, 1171–6 (2013).
- 698 53. Brune, M. *et al.* Mechanism of Inorganic Phosphate Interaction with Phosphate Binding  
699 Protein from *Escherichia coli* †. *Biochemistry* **37**, 10370–10380 (1998).
- 700 54. Brune, M., Hunter, J. L., Corrie, J. E. & Webb, M. R. Direct, real-time measurement of rapid  
701 inorganic phosphate release using a novel fluorescent probe and its application to actomyosin  
702 subfragment 1 ATPase. *Biochemistry* **33**, 8262–71 (1994).
- 703 55. De La Cruz, E. M. & Pollard, T. D. Nucleotide-free actin: stabilization by sucrose and  
704 nucleotide binding kinetics. *Biochemistry* **34**, 5452–61 (1995).
- 705 56. Kabsch, W. XDS. *Acta Crystallogr. D. Biol. Crystallogr.* **66**, 125–32 (2010).
- 706 57. Adams, P. D. *et al.* PHENIX: a comprehensive Python-based system for macromolecular  
707 structure solution. *Acta Crystallogr. D. Biol. Crystallogr.* **66**, 213–21 (2010).
- 708 58. McCoy, A. J. *et al.* Phaser crystallographic software. *J. Appl. Crystallogr.* **40**, 658–674  
709 (2007).
- 710 59. Terwilliger, T. C. *et al.* Decision-making in structure solution using Bayesian estimates of  
711 map quality: the PHENIX AutoSol wizard. *Acta Crystallogr. D. Biol. Crystallogr.* **65**, 582–  
712 601 (2009).
- 713 60. Afonine, P. V *et al.* Towards automated crystallographic structure refinement with  
714 phenix.refine. *Acta Crystallogr. D. Biol. Crystallogr.* **68**, 352–67 (2012).
- 715 61. Grant, B. J., Rodrigues, A. P. C., ElSawy, K. M., McCammon, J. A. & Caves, L. S. D.  
716 Bio3d: an R package for the comparative analysis of protein structures. *Bioinformatics* **22**,  
717 2695–6 (2006).

718



718 **FIGURE LEGENDS**

719 **Fig. 1.** Active site configurations in the *PfActI* and *PbActII* structures. (a) Overview of the Mg-  
720 ATP/ADP-*PfActI* monomer with the D-loop, S-loop, H-loop, G-loop, P-loop and W-loop as well as  
721 the plug and A-loop indicated. The region of interest enlarged in the other panels is boxed. (b-d)  
722 *PfActI* structures in the (b) Ca-ATP<sup>8</sup>, (c) Mg-ATP/ADP, and (d) Mg-ADP states. (e-f) *PbActII*  
723 structures in (e) Ca-ATP<sup>8</sup> and (f) Mg-ADP states. In all panels, hydrogen bonds with ATP, ADP, or  
724 ions are indicated with black dashed lines and the outer shell hydrogen bonding via water molecules  
725 with red dashed lines. In (b-c), the brown solid line indicates the nucleophilic attack vector of the  
726 putative catalytic water<sup>34</sup> (H<sub>2</sub>O<sup>\*</sup>). In (c-d), anomalous difference density is shown as a purple mesh  
727 at a 4 $\sigma$  contour level. The inner domain (ID) and outer domain (OD) are colored in orange and gray,  
728 respectively, in all panels.

729

730 **Fig. 2.** PCA analysis of actins. (a) Plot of twistedness (PC1) vs. openness (PC2) of the full dataset  
731 of 147 actin structures (**Online Methods, Supplementary Movie 1**). Defined structural groups of  
732 filament structures (dark purple), profilin-bound open structures (orange), free G-actin structures  
733 (light purple) and ADF/cofilin bound structures (pink) are indicated with **F**, **Pfn**, **G** and **C**,  
734 respectively. The large heterogeneous group in the middle is shaded in gray. Structures of interest  
735 are indicated with circles or squares and names or PDB identifiers, whereas others are indicated  
736 with black dots. (b) Zoomed view of (a) containing the *Plasmodium* actin structures (excluding  
737 *PbActII* Mg-ADP) as well as four mutant *D. discoideum* actin structures<sup>20</sup> constituting a full set of  
738 nucleotide and divalent cation states. (c) PCA of *Plasmodium* actin structures only (**Online**  
739 **Methods**), with similar notation as in (a). (d) Zoomed view of (c) containing all relevant *PfActI*  
740 structures excluding the H74Q mutant and the *PbActI*- $\alpha$ -actin chimera<sup>8</sup>. The lines and dashed lines  
741 between the *PfActI* and *PbActII* structures indicate the path in the hydrolytic direction (ATP-  
742 ATP/ADP-ADP) as appropriate for each set of structures.

743

744 **Fig. 3.** Orientation of the A-loop in *PfActI* and *PbActII*. (a-d) Wild-type *PfActI* in the (a) Ca-ATP  
745 state<sup>8</sup> (**1a** and **1b**), (b) Mg-ATP/ADP state (**1a** and **1b**), (c) Mg-ATP/ADP state (**2a**), and (d) Mg-  
746 ADP state (**1b** and **2a**). (e-f) *PfActI* mutants (e) A272W in the Mg-ATP/ADP state (**1b**) and (f)

747 H74Q in the Mg-ATP state (**2b**). (g) Wild-type *PfActI* in the F-state<sup>9</sup> (**1b**), stabilized by  
748 jasplakinolide (not depicted, see **Fig. 5g** for the jasplakinolide orientation in the filament structure).  
749 (h-i) Wild-type *PbActII* in the (h) Ca-ATP<sup>8</sup> (**1b**) and (i) Mg-ADP states (**1b**). In (h), His73 is  
750 methylated for consistency even though it is not in the deposited model. The most probable ionic  
751 and hydrogen bonding interactions are indicated with dashed lines. The conformers of the H-loop  
752 are attributed to each conformation based on overlap of van der Waals radii as well as distances and  
753 geometry for hydrogen bonding.

754

755 **Fig. 4.** Conformation of the H-loop residues 70-74 as well as the domain cleft spanning Arg184 in  
756 *PfActI* and corresponding residues 69-73 and Arg183 in *PbActII*. (a) Overview of the wild-type  
757 *PfActI* monomer in the Ca-ATP state<sup>8</sup> for positional reference. (b-e) wild-type *PfActI* in the (b) Ca-  
758 ATP state<sup>8</sup>, (c) Mg-ATP/ADP state, (d) Mg-ADP state, and (e) F-state<sup>9</sup>. (f-g) *PfActI* mutants (f)  
759 A272W in the Mg-ATP/ADP and (g) H74Q in Mg-ATP states. (h-i) Wild-type *PbActII* in the (h)  
760 Ca-ATP<sup>8</sup> and (i) Mg-ADP states. The inner domain (ID) and outer domain (OD) are colored in  
761 orange and gray, respectively, in all panels. His73 of *PbActII* in (h) is methylated for consistency  
762 even though it is non-methylated in the original PDB entry. Interatomic distances amenable to ionic  
763 interactions or hydrogen bonding are shown as dashed lines.

764

765 **Fig. 5.** Interaction of the C terminus of *PfActI* and *PbActII* with Lys114 (Lys113 in *PbActII*) and  
766 Glu118 (Glu117 in *PbActII*) of  $\alpha 3$ . (a) Wild-type *PfActI* in Mg-ATP/ADP state shows a disordered  
767 C terminus. *PfActI* G115A mutant, in contrast, shows an ordered C terminus in (b) Ca-ATP state  
768 and (c) Mg-ATP/ADP state, similar to (d) H74Q mutant in the Mg-ATP state. (e) Wild-type *PfActI*  
769 in the jasplakinolide-stabilized F-state state<sup>9</sup> and (f) *PbActII* in the Mg-ADP state also have  
770 stabilized C termini. The C-terminal His372 interacts with Lys114 and Glu118 of  $\alpha 3$  due to the  
771 displacement of the N-terminal tip of the helix. In G115A, this is caused by the altered backbone  
772 conformation. In H74Q, the effect is likely indirect. In wild-type *PfActI*, the C terminus is not  
773 stabilized in any gelsolin-bound structure by the His372 interactions, but they are retained in the  
774 jasplakinolide-stabilized filament structure due to interactions of the P-loop with the bromoindole  
775 moiety in jasplakinolide. In *PbActII* (f), residue 114 (corresponding to Gly115 in *PfActI*) is

776 threonine and elicits a stabilization of the C terminus. (g) Jasplakinolide interactions with the  
777 Proline-rich loop and the A-loop in the filamentous *PfActI* structure<sup>9</sup>. Interaction distances  
778 amenable to ionic or hydrogen bonding interactions ( $\leq 4 \text{ \AA}$ ) are indicated with dashed lines. JAS:  
779 jasplakinolide, C: C-terminus. The inset in (g) shows the position in the filament.

780

781 **Fig. 6.** Mechanistic model of *PfActI* monomer activation, fragmentation, and nucleotide recharge.  
782 Monomer activation takes place by a conformational change from **1a** (I) to **1b** (II), conferring two  
783 new back-face interactions that stabilize an F-like conformation. Upon polymerization (III), two  
784 new interactions are formed, further stabilizing the flat conformation. In F-*PfActI*, ATP is  
785 hydrolyzed to ADP, and the  $P_i$  is released without major rearrangements, causing a further  
786 reduction in interactions spanning the ID-OD cleft via the G- and S-loops (loss of five hydrogen  
787 bonds between *PfActI* and  $P_\gamma$ ; not depicted). In a hypothetical model of F-*PfActI*, where  
788 conformation **2a** is adopted (IV), two interactions formed by the adoption of **1b** (II) are broken,  
789 causing a destabilization of the OD in respect to the ID, promoting a filament break. Upon  
790 fragmentation and dissociation of the monomer from the newly-formed pointed end, conformation  
791 **2a** is retained (V) in the ADP-*PfActI* monomer, the nucleotide is exchanged, and conformation **1a**  
792 is returned (VI). Changes in the number of interactions on the back face of the monomer (on the  
793 inside of the filament) across the ID-OD cleft are highlighted in blue circles. Total interactions  
794 (hydrogen bonds, ionic interactions and cation- $\pi$  interactions) across the ID-OD cleft are 1, 3, 5, 2,  
795 1 in G-Mg-ATP **1a**, G-Mg-ATP **1b**, F-Mg-ADP **1b**, F-Mg-ADP **2a**, and G-Mg-ADP **2a**,  
796 respectively, excluding changes caused by loss of  $P_\gamma$ .  
797

797 **Table 1:** Phosphate release rates of actins in Ca, Mg and MgK conditions and activation by Mg<sup>2+</sup>  
 798 and K<sup>+</sup> at actin concentrations of 1 μM.

|                        | Condition                                 |                                           |                                            | Activation                     |                               |
|------------------------|-------------------------------------------|-------------------------------------------|--------------------------------------------|--------------------------------|-------------------------------|
|                        | Ca<br>(10 <sup>-4</sup> s <sup>-1</sup> ) | Mg<br>(10 <sup>-4</sup> s <sup>-1</sup> ) | MgK<br>(10 <sup>-4</sup> s <sup>-1</sup> ) | by Mg <sup>2+</sup><br>(Mg/Ca) | by K <sup>+</sup><br>(MgK/Mg) |
| K270M <sup>†</sup>     | 0.21±0.01 <sup>*</sup>                    | 4.6±0.19 <sup>*</sup>                     | 6.2±0.60 <sup>*</sup>                      | 22±1.7 <sup>*</sup>            | 1.4±0.2 <sup>*</sup>          |
| A272W <sup>†</sup>     | 0.52±0.02 <sup>*</sup>                    | 9.78±0.06 <sup>*</sup>                    | 9.9±0.19 <sup>*</sup>                      | 18.9±0.9 <sup>*</sup>          | 1.02±0.03 <sup>*</sup>        |
| A272C <sup>†</sup>     | 0.30±0.01 <sup>*</sup>                    | 1.54±0.06                                 | 1.69±0.06 <sup>*</sup>                     | 5.1±0.4 <sup>*</sup>           | 1.09±0.08 <sup>*</sup>        |
| E49G <sup>†</sup>      | 0.58±0.02 <sup>*</sup>                    | 2.8±0.13 <sup>*</sup>                     | 2.8±0.20 <sup>*</sup>                      | 4.7±0.4 <sup>*</sup>           | 1.0±0.1                       |
| F54Y <sup>†</sup>      | 1.20±0.08 <sup>*</sup>                    | 3.14±0.09 <sup>*</sup>                    | 2.8±0.12 <sup>*</sup>                      | 2.6±0.3                        | 0.90±0.07                     |
| P42Q/E49G <sup>†</sup> | 0.52±0.03 <sup>*</sup>                    | 1.18±0.04 <sup>*</sup>                    | 1.18±0.09                                  | 2.3±0.2                        | 1.0±0.1                       |
| <i>PfAct1 wt</i>       | 0.74±0.03                                 | 1.62±0.05                                 | 1.3±0.12                                   | 2.2±0.2                        | 0.8±0.1                       |
| G115A <sup>†</sup>     | 0.70±0.07                                 | 1.05±0.04 <sup>*</sup>                    | 1.00±0.07                                  | 1.6±0.6                        | 1.0±0.2                       |
| P42Q <sup>†</sup>      | 1.24±0.03 <sup>*</sup>                    | 1.75±0.02                                 | 1.52±0.09                                  | 1.41±0.05 <sup>*</sup>         | 0.87±0.07                     |
| H74Q <sup>†</sup>      | 0.27±0.03 <sup>*</sup>                    | 0.27±0.01 <sup>*</sup>                    | 0.21±0.03 <sup>*</sup>                     | 1.0±0.2 <sup>*</sup>           | 0.8±0.2                       |
| <i>PbActII</i>         | 0.60±0.04 <sup>*</sup>                    | 0.67±0.05 <sup>*</sup>                    | 0.56±0.02 <sup>*</sup>                     | 1.1±0.1 <sup>*</sup>           | 0.83±0.09                     |
| <i>α-actin</i>         | 0.22±0.01 <sup>*</sup>                    | 0.68±0.01 <sup>*</sup>                    | 1.99±0.02 <sup>*</sup>                     | 3.1±0.2 <sup>*</sup>           | 2.92±0.08 <sup>*</sup>        |

\*: P < 0.01 (N = 3), two-tailed Student's T-test vs. corresponding values of *PfActI* wildtype.

†: Mutants are of *PfActI*.

*PfActI* results are ordered by Mg<sup>2+</sup> activation.

Errors represent standard deviations.

799  
 800  
 801  
 802

803

803 **Table 2.** Phosphate release rates of actins in Ca, Mg and MgK conditions and activation by Mg<sup>2+</sup>  
 804 and K<sup>+</sup> at actin concentrations of 3-6 μM.

|                            | Condition                                 |                                           |                                            | Activation                     |                               |
|----------------------------|-------------------------------------------|-------------------------------------------|--------------------------------------------|--------------------------------|-------------------------------|
|                            | Ca<br>(10 <sup>-4</sup> s <sup>-1</sup> ) | Mg<br>(10 <sup>-4</sup> s <sup>-1</sup> ) | MgK<br>(10 <sup>-4</sup> s <sup>-1</sup> ) | by Mg <sup>2+</sup><br>(Mg/Ca) | by K <sup>+</sup><br>(MgK/Mg) |
| <i>PfActI</i><br>(3.5 μM)  | 0.38±0.004                                | 1.7±0.04                                  | 1.7±0.08                                   | 4.5±0.2                        | 1.0±0.08                      |
| <i>PbActII</i><br>(3.8 μM) | 0.15±0.009                                | 1.6±0.03                                  | 7.0±0.4                                    | 11.0±1.0                       | 5.0±0.4                       |
| <i>α-actin</i><br>(5.9 μM) | 0.095±0.003                               | 2.9±0.06                                  | 7.0±0.1                                    | 31.0±1.6                       | 2.2±0.09                      |

805 P < 0.01 (N = 3) for all *PbActII* and *α-actin* values, two-tailed Student's T-test vs. corresponding values of *PfActI* wildtype.  
 806 Errors represent standard deviations.

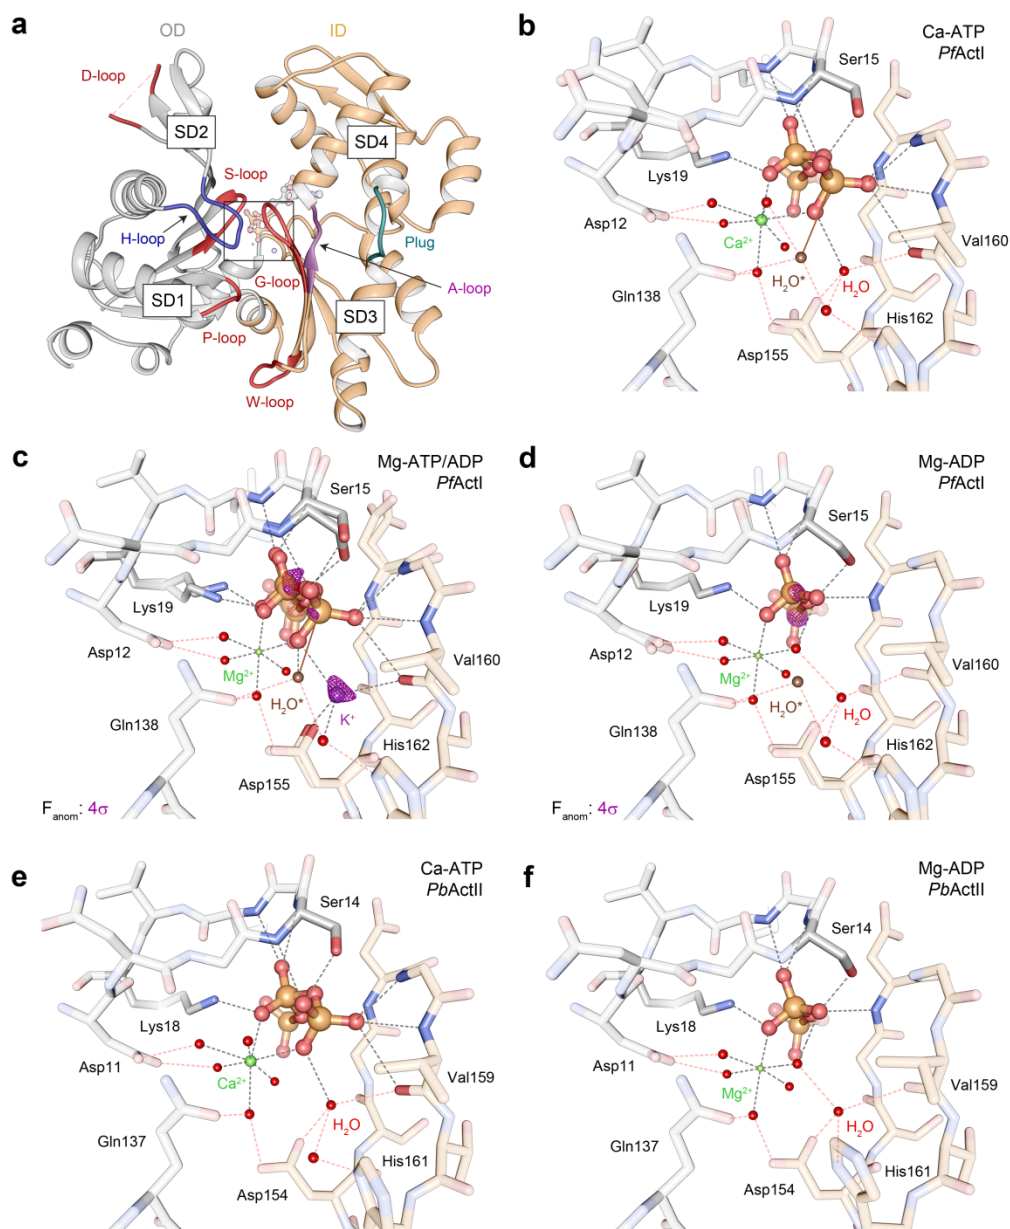

807

Figure 1

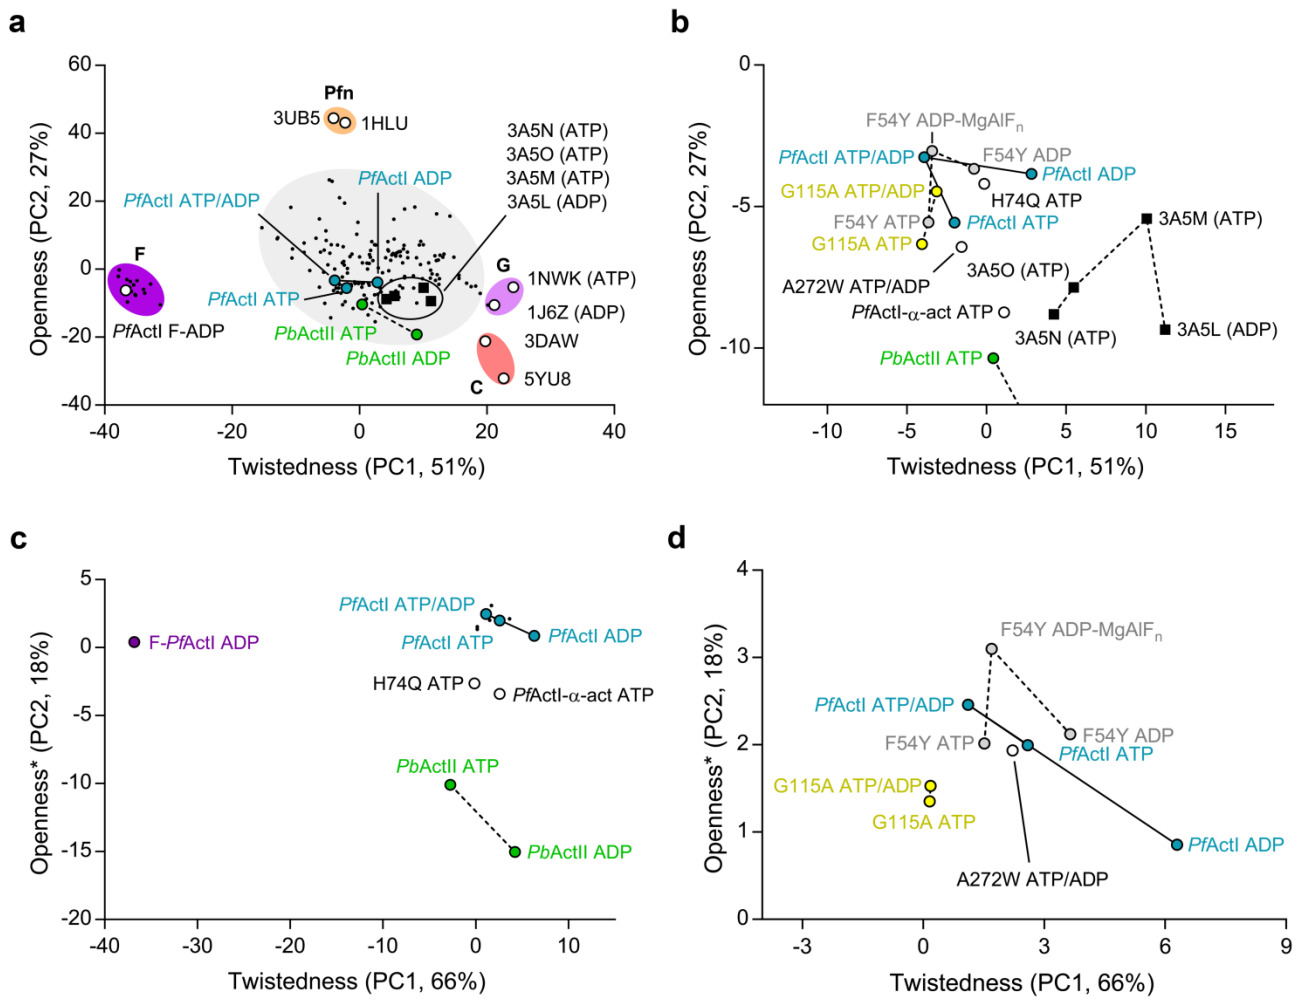

808 **Figure 2**

809

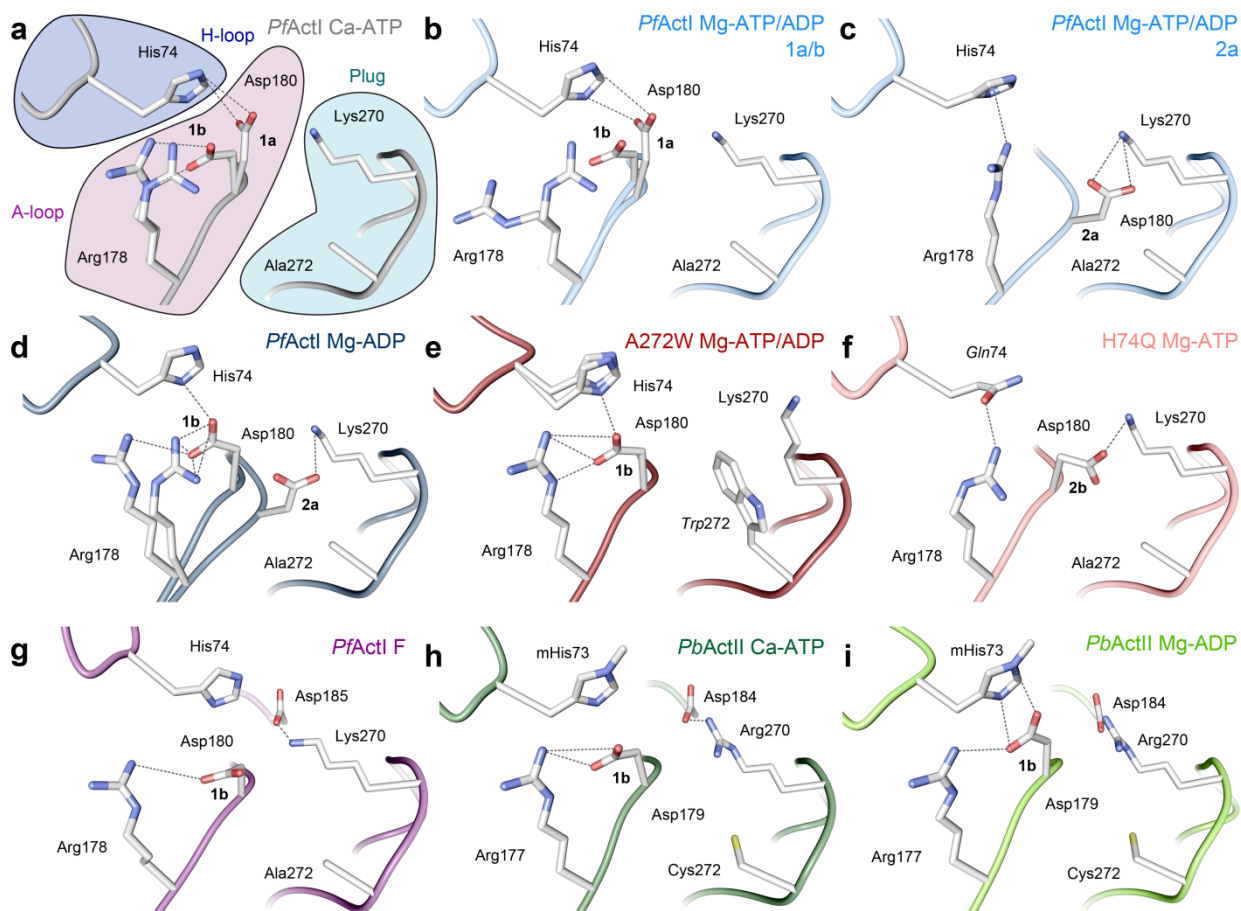

809

**Figure 3**

810



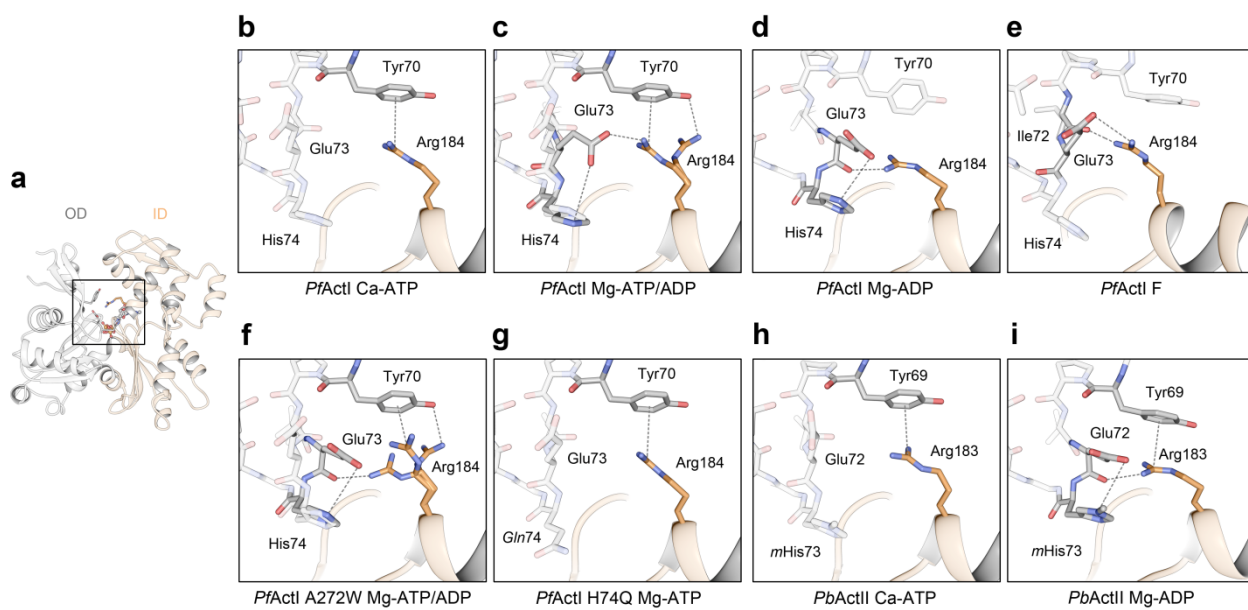

811 **Figure 4**

812

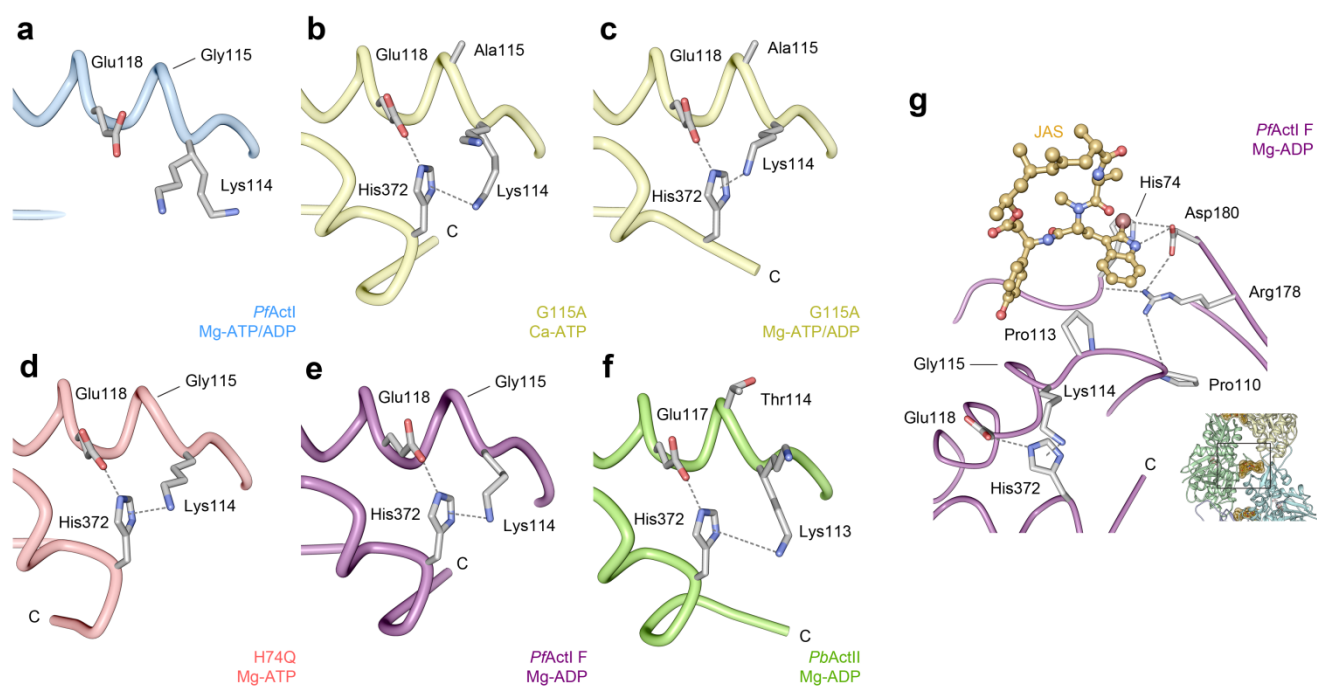

812 **Figure 5**

813

813

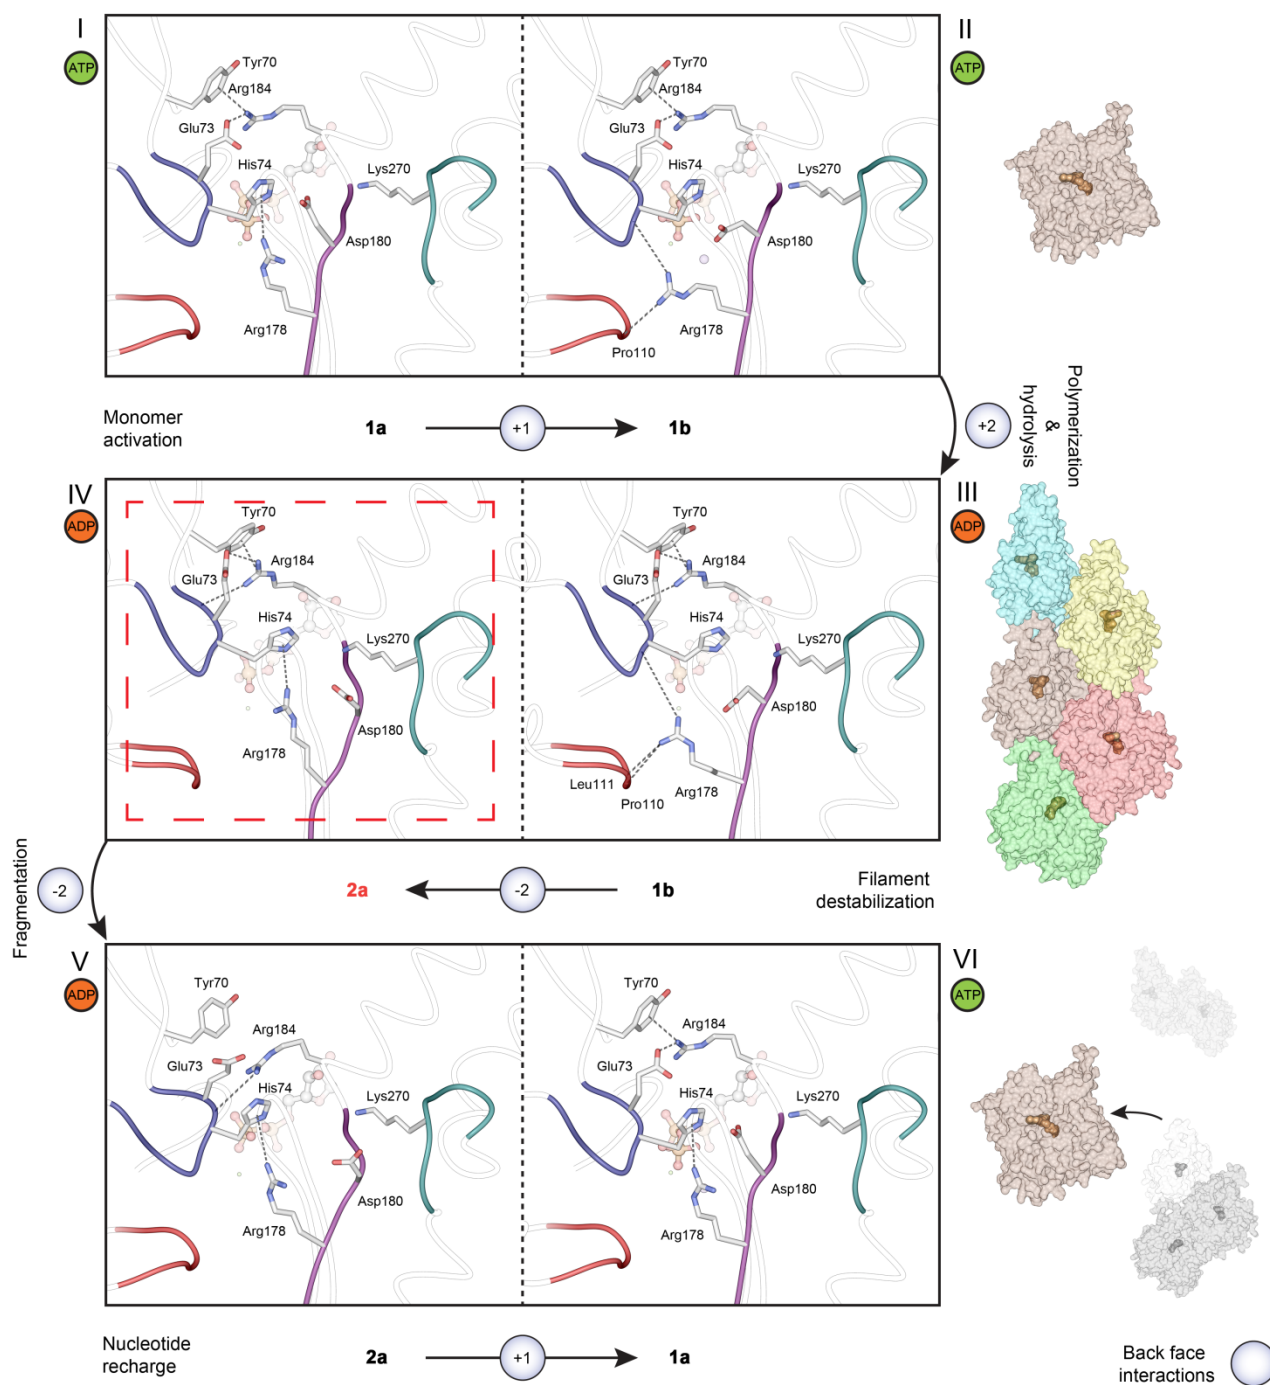

814 **Figure 6**
